1     **Functional analysis of the archaea, bacteria, and viruses from**  
2                     **a halite endolithic microbial community**

3

4     Alexander Crits-Christoph<sup>1</sup>, Diego R. Gelsinger<sup>1</sup>, Bing Ma<sup>2</sup>, Jacek Wierzchos<sup>3</sup>, Jacques  
5     Ravel<sup>2</sup>, Alfonso Davila<sup>4</sup>, M. Cristina Casero<sup>3</sup>, and Jocelyne DiRuggiero<sup>1§</sup>

6     <sup>1</sup>*Biology Department, The Johns Hopkins University, Baltimore, MD, USA;* <sup>2</sup>*Institute for*  
7     *Genome Sciences, University of Maryland School of Medicine, Baltimore, MD, USA;*  
8     <sup>3</sup>*Museo Nacional de Ciencias Naturales, MNCN - CSIC, Madrid, Spain;* <sup>4</sup>*Carl Sagan*  
9     *Center, SETI Institute, Mountain View, CA, USA*

10

11     Running Title: halite metagenome

12     Keywords: halite, endoliths, cyanobacteria, archaea, viruses, extreme environment,  
13     Atacama Desert, metagenomics

14

15     §Corresponding author:

16     Jocelyne DiRuggiero

17     Johns Hopkins University

18     Biology Department

19     3400 N. Charles Street, Mudd Hall

20     Baltimore MD 21218, USA

21     Phone: 410-516-8498

22     Fax: 410-516-5213

23     Email: [jdiruggiero@jhu.edu](mailto:jdiruggiero@jhu.edu)

24

25

26     *The authors declare that there are no competing financial interests in relation to the*  
27     *work described here.*

28

## 29 **Abstract**

30 Halite endoliths in the Atacama Desert represent one of the most extreme microbial  
31 ecosystems on Earth. Here we sequenced and characterized a shotgun metagenome from  
32 halite nodules collected in Salar Grande, Chile. The community is dominated by archaea  
33 and functional analysis attributed most of the autotrophic CO<sub>2</sub> fixation to a unique  
34 cyanobacterium. The assembled 1.1 Mbp genome of a novel nanohaloarchaeon,  
35 *Candidatus* Nanopetramus SG9, revealed a photoheterotrophic life style and a low  
36 median isoelectric point (pI) for all predicted proteins, suggesting a “salt-in” strategy for  
37 osmotic balance. Predicted proteins of the algae identified in the community also had pI  
38 distributions similar to “salt-in” strategists. The Nanopetramus genome contained a  
39 unique CRISPR/Cas system with a spacer that matched a partial viral genome from the  
40 metagenome. A combination of reference-independent methods identified over 30  
41 complete or near complete viral or proviral genomes with diverse genome structure,  
42 genome size, gene content, and hosts. Putative hosts included *Halobacteriaceae*,  
43 *Nanohaloarchaea*, and *Cyanobacteria*. Despite the dependence of the halite community  
44 on deliquescence for liquid water availability, this study exposed an ecosystem spanning  
45 three phylogenetic domains, containing a large diversity of viruses, and a predominant  
46 “salt-in” strategy to balance the high osmotic pressure of the environment.

47

## 48 **Introduction**

49 In the most arid deserts on Earth, microorganisms find refuge inside rock substrates as a  
50 survival strategy (Pointing and Belnap, 2012, Wierzchos *et al.*, 2012b). The rock  
51 environment provides physical stability, protection from incident UV and excessive shifts  
52 in temperature, and enhances moisture availability (Chan *et al.*, 2012, Walker and Pace,  
53 2007). The colonized substrates are translucent, allowing primary production to occur via  
54 photosynthesis (Walker and Pace, 2007, Wierzchos *et al.*, 2012b). These endolithic  
55 communities are typically composed of cyanobacteria associated with diverse  
56 heterotrophic bacteria and/or archaea, and sometimes eukaryotes (Chan *et al.*, 2013,  
57 Robinson *et al.*, 2015, Wierzchos *et al.*, 2012b). The diversity of rock habitats colonized  
58 by microorganisms has shown that life has found innovative ways to adapt to the extreme  
59 conditions of hyper-arid deserts (Friedmann 1982, DiRuggiero *et al.*, 2013, Pointing *et al.*,  
60 2009, Wei *et al.*, 2015, Wierzchos *et al.*, 2012b). This is in stark contrast to soil, where  
61 microorganisms under extreme water stress and restricted access to nutrient must undergo  
62 long periods of stasis (Crits-Christoph *et al.*, 2013).

63 The Atacama Desert in Northern Chile is one of the oldest and driest deserts on Earth  
64 (Clarke 2006). In the hyper-arid zone of the desert, with decades between rainfall events  
65 and extremely low air relative humidity (RH) (mean yr<sup>-1</sup> values <35%), deliquescence of  
66 ancient halite crusts of evaporitic origin was shown to provide sufficient moisture to  
67 sustain microbial communities (Davila *et al.*, 2008, de los Rios *et al.*, 2010, Robinson *et*  
68 *al.*, 2015, Wierzchos *et al.*, 2012a). Within the halite nodules, capillary condensation of  
69 water vapor at air RH as low as 50-55%, due to the presence of pores smaller than 100  
70 nm surrounding large NaCl crystals inside the nodules, was reported as a potential source

71 of water for microorganisms (Davila *et al.*, 2008, Wierzchos *et al.*, 2012a). Under these  
72 conditions, the halite nodule interior in the Yungay area of the hyper-arid core remained  
73 wet for 5,362 hours yr<sup>-1</sup> (Wierzchos *et al.*, 2012a). In contrast, in Salar Grande, located in  
74 the southwest area of the Tarapacá Region, coastal fogs are frequent (Cereceda *et al.*,  
75 2008a, Cereceda *et al.*, 2008b) leading to constant moisture inside the nodules (Robinson  
76 *et al.*, 2015).

77 High-throughput culture-independent methods based on 16S rRNA gene sequencing have  
78 shown that the Atacama halite communities were dominated by archaea from the  
79 *Halobacteriaceae* family. The communities also contained a unique cyanobacterium  
80 related to *Halothece* species and diverse heterotrophic bacteria (de los Rios *et al.*, 2010,  
81 Robinson *et al.*, 2015). Halite communities exposed to coastal fogs were more diverse and  
82 harbored a novel type of algae that was not found in the Yungay nodules, suggesting that  
83 the environmental conditions in this habitat might be too extreme for eukaryotic  
84 photosynthetic life (Robinson *et al.*, 2015).

85 Assimilation of atmospheric radiocarbon into the halite microbial community biomass  
86 showed that carbon cycling inside the halite nodules was ongoing, with carbon turnover  
87 times of less than a decade in Salar Grande (Ziolkowski *et al.*, 2013). Measurements of  
88 chlorophyll fluorescence using Pulse Amplitude Modulated (PAM) fluorometry recently  
89 demonstrated *in situ* active metabolism in halite endolithic communities (Davila *et al.*,  
90 2015). Photosynthetic activity was tightly linked to moisture availability and solar  
91 insolation and was sustained for days after a wetting event (Davila *et al.*, 2015).  
92 Radiolabelled experiments showed that the halite communities fixed CO<sub>2</sub> via

93 photosynthesis and further evidence of metabolic activity was supported by oxygen  
94 production and respiration (Davila *et al.*, 2015).

95 To further characterize halite endoliths, we sequenced the pooled metagenome of a  
96 microbial community associated with halite nodules. We found novel microorganisms,  
97 community members from the three domains of life, and a large diversity of viruses. The  
98 functional annotation of the metagenome revealed communities highly specialized to the  
99 extreme salinity of the environment.

100

## 101 **Materials and methods**

### 102 *Sampling, DNA extraction, and sequencing*

103 The colonization zone from 5 halite nodules collected in Salar Grande (Fig. 1) was  
104 harvested using aseptic conditions in a laminar flow hood and pooled together for DNA  
105 extraction, as previously described (Robinson *et al.*, 2015). Sequencing was performed  
106 on the Illumina HiSeq2500 at the University of Maryland School of Medicine Institute  
107 for Genome Sciences (Baltimore, MD).

### 108 *Whole Metagenome Analysis*

109 Sequencing produced 95,230,365 paired-end reads. After quality control (see details in  
110 supplementary material), reads were assigned taxonomy content using PhyloSift (Darling  
111 *et al.*, 2014) and the functional content was characterized using the analysis server MG-  
112 RAST (Meyer *et al.*, 2008). The metagenome was assembled using the IDBA-UD  
113 assembler (Peng *et al.*, 2012). We use a  $k$  range of 20-100 with a pre-correction step  
114 before assembly, producing a meta-assembly with a mean contig size of 1,060 bp, a max

115 contig size of 377,822 bp, and a contig n50 of 1,558 bp. Assembled contigs were grouped  
116 into potential draft genomes using tetranucleotide frequencies, abundance levels, and  
117 single-copy gene analysis with MaxBin (Wu *et al.*, 2014). Genomic bins were assigned  
118 taxonomic ranks with PhyloSift and Kraken (Darling *et al.*, 2014, Wood and Salzberg  
119 2014).

#### 120 *Algae genome*

121 Genomic bin 18 contained a high number of eukaryotic marker genes ( $\sim\frac{1}{3}$  of all marker  
122 genes in the bin), all of which were identified to belong to a member of the eukaryotic  
123 green algae using BLASTP against the non-redundant (nr) database at NCBI. Contigs  
124 assembly and annotation are further described in supplementary material.

#### 125 *Nanohaloarchaea genome*

126 Four of the largest assembled contigs were binned together with MaxBin (Wu *et al.*,  
127 2014) and identified as the partial genome of a member of the Nanohaloarchaea.  
128 Reassembly methods (see details in supplementary material) resulted in a single  
129 assembled genomic contig. The completed assembly was uploaded to and annotated  
130 using the RAST server (Aziz *et al.*, 2008). A CRISPR/Cas system was annotated using  
131 RAST and CRISPRFinder (Grissa *et al.*, 2007). BLASTN was used to match CRISPR  
132 spacers to the assembled metagenome content.

133 Phylogenetic positioning of the novel *Candidatus* Nanopetramus SG9 genome was  
134 performed by extracting 12 ribosomal marker genes shared by archaeal genomes with  
135 PhyloSift (Darling *et al.* 2014), aligning with MUSCLE (Edgar, 2004), and building a  
136 Maximum-Likelihood tree with FastTree (Price *et al.*, 2010) using concatenated  
137 conserved blocks from each alignment (Gblocks) (Castresana 2000). The G+C content of

138 the CRISPR/Cas system was calculated and compared to the average G+C content for 10  
139 kbp windows across the entire genome. The phylogenetic position of the CRISPR/Cas  
140 system was determined by aligning Cas1 proteins from key archaeal species using  
141 MUSCLE and by building a Maximum-Likelihood tree using FastTree.

#### 142 *Viral genomes*

143 VirSorter (Roux *et al.*, 2015) was used to extract viral genomic content from the  
144 assembled metagenome and viral contigs greater than 12 kbp were annotated and  
145 examined. All contigs greater than 5 kbp were checked for evidence of circularity using a  
146 custom Python script, CircMG (<https://github.com/alexcritschristoph/CircMG>). The  
147 RAST annotation server failed to annotate the majority of proteins encoded on the viral  
148 contigs. ORFs were predicted for each putative genome with Prodigal (Hyatt *et al.*,  
149 2010). To compare relationships within the halite viral community, all predicted viral  
150 proteins were compared against all others using BLASTP and an e-value cutoff of 0.001,  
151 producing a protein-protein similarity network. This network was used to build a virus-  
152 virus weighted undirected network, where the edge weight between two viruses was  
153 determined by the sum of the amino acid percent identity of all protein-protein matches  
154 between two viruses, divided by the total number of predicted genes in both viral  
155 genomes.

156 Community finding was run on the virus-virus network using the Walktrap community  
157 finding algorithm (Pons and Latapy, 2005). All network analyses were done in R using  
158 the igraph package (Csardi and Nepusz, 2006). The largest clusters in the protein-protein  
159 network (representing conserved proteins) were annotated using BLASTP to the nr  
160 protein database (Gish and States 1993) and HHPred (Söding *et al.*, 2005).

161 *Sequence data and availability*

162 All sequences were deposited at the National Center for Biotechnology Information  
163 Sequence Read Archive under Bioproject PRJNA296403 and accession number  
164 SRP064713. The MG-RAST report for the data is available under ID 4600831.3  
165 (<http://metagenomics.anl.gov/linkin.cgi?metagenome=4600831.3>).

166 Completed assemblies, annotation, and phylogenetic trees are available at  
167 <http://figshare.com/s/02565916783811e58e4b06ec4bbcf141>

168

169 **Results**

170 *Halite metagenome taxonomic and functional analyses*

171 We characterized at the molecular level the endolithic microbial community from halite  
172 nodules from Salar Grande (Fig. 1). Due to the difficulty in harvesting enough DNA from  
173 the colonization zone of a single halite nodule, the metagenome was obtained with DNA  
174 extracted from 5 different nodules. The metagenome sequence of the halite community  
175 was composed of 9.6 Gb of high quality, paired-end, metagenomic shotgun sequences.  
176 Taxonomic assignments of the metagenomic reads performed with PhyloSift (Darling *et*  
177 *al.* 2014) revealed a community dominated by Archaea (71%) and also composed of  
178 Bacteria (27%) and Eukarya (1%) (Fig. 2). *Halobacteria* represented the majority of the  
179 Archaea (90%) with a small representation of *Nanohaloarchaea* (~2%). Most bacteria  
180 belonged to the *Salinibacter* genera (63%) and cyanobacteria constituted 15% of the  
181 bacteria. Reconstruction of 16S rRNA gene sequences from the metagenomic dataset  
182 with EMIRGE (Miller *et al.*, 2011) provided full-length genes for all the major  
183 taxonomic groups and was consistent with our previous work using 16S rRNA gene



184 sequencing (Robinson *et al.*, 2015) (Fig. S1).

185 The functional composition of the halite metagenome was analyzed with MG-RAST  
186 (Meyer *et al.*, 2008) using total sequence reads (Fig. S2). Of the genes involved in carbon  
187 metabolism, only 8% were allocated to autotrophic CO<sub>2</sub> fixation (Fig. S3a) and the  
188 Calvin-Benson cycle (CB) was the only pathway for autotrophic CO<sub>2</sub> fixation (Fig. 3b).

189 The majority of the assigned RubisCO type I genes (>91%) were attributed to members  
190 of the *Cyanobacteria* (Fig. S4). We identified a small number of RubisCO type III genes  
191 and those were all from members of the *Halobacteriaceae*. Other key enzymes of the CB  
192 pathway, phosphoribulokinase and sedoheptulose-1,7-bisphosphatase, were also present  
193 and more than 99% of those sequences belonged to *Cyanobacteria*. Pathways for CO<sub>2</sub>  
194 concentration (carboxysomes) and phosphoglycolate detoxification (photorespiration)  
195 were also present in the halite metagenome and were from *Cyanobacteria* (Fig. S3b).

196 With respect to photosynthesis, most of the genes for Photosystem I and II (PSI and PSII)  
197 major proteins, and for light harvesting complexes, belonged to *Cyanobacteria* with only  
198 a small fraction assigned to green algae (Fig. S5 and S6). For all photosystems, 24 to  
199 26% of all sequences were not given a taxonomic rank and 3% of PSII sequences were  
200 assigned to unclassified viruses (Fig. S5b). Phototrophy was also supported via light-  
201 driven proton pumps that belong to a number of heterotrophs including *Roseiflexus*  
202 species (proteorhodopsin), *Salinibacter* (xanthorhodopsin), and *Halobacteriaceae*  
203 (bacteriorhodopsin) (Fig. S7). Surprisingly, no nitrogenase (*nif*) genes were detected (Fig.  
204 S8).

205 *Osmotic adaptation of the algae from the halite community*

206 We found 89 complete or partially complete genes identified as belonging to a eukaryotic  
207 alga with an average coverage of 7.2x and a maximum contig length of 3.9 kbp. The  
208 majority of these genes mapped closely to homologs in either *Ostreococcus tauri* or  
209 *Micromonas* sp. RCC299. Known genes included heat shock protein 70, DNA mismatch  
210 repair protein MSH4, and multiple RNA splicing factors. Eukaryotic translation initiation  
211 factors, RNA polymerase subunits, and multiple enzymes and ribosomal proteins were  
212 also identified (Table S2). Using concatenated sequences of chloroplast and  
213 mitochondrial genes, we found that the alga clustered with other members of the  
214 *Chlorophyta* (Fig. S9), grouping consistently with the *Micromonas* and *Ostreococcus*  
215 species and thereby confirming our previous phylogenetic position (Robinson *et al.*,  
216 2015).

217 To reveal potential adaptations to high salt, we compared the isoelectric point (pI) of the  
218 halite alga predicted proteins with that of the translated proteomes for *Micromonas* sp.  
219 RCC299, *O. tauri*, and the reported proteins for *Dunaliella salina*, all belonging to  
220 halophilic algae (Fig. 3) (Paul *et al.*, 2008). Proteins from the halite alga had a  
221 statistically significantly lower mean pI (6.19) than the known reference proteins from  
222 *Micromonas* sp. RCC299 (6.97), *O. tauri* (7.60), and *D. salina* (7.7) (Mann-Whitney t-  
223 test;  $p < 0.001$ ). Isoelectric point distributions were compared using nonparametric  
224 statistical tests. Using a paired one-sided Wilcoxon t-test, we found that the predicted  
225 halite alga proteins had significantly lower pI when paired using BLASTP with *O. tauri*  
226 homologues ( $n=85$ ;  $p < 0.001$ ; difference of means: 0.55) and with *Micromonas* sp.  
227 RCC299 homologues ( $n=87$ ;  $p=0.025$ ; difference of means: 0.24). A paired-sample  
228 bayesian model comparison, implemented with BEST (Bååth, 2014, Kruschke, 2013),

229 reported that the probability that the proteins of the halite alga had a lower mean pI  
230 (difference of means less than 0) than that of *Micromonas* sp. RCC299 was 97.9%. This  
231 analysis predicted that the halite alga might have one of the lowest protein pI  
232 distributions of any reported eukaryote.

233 The halite metagenome also contained a number of genes from algal organelles. A 29.8  
234 kbp contig with 39% G+C carried several chloroplast genes with high similarity to the *O.*  
235 *tauri* chloroplast genome, which is 71.7 kbp and 39.9% G+C. Genes encoding for PSI  
236 and PSII protein subunits, cytochrome protein subunits, ribosomal proteins, and for  
237 rRNAs and tRNAs were also found on the 29.8 kbp contig. In the same genomic bin, we  
238 also found 8 non-overlapping contigs that contained mitochondrial genes from algae. The  
239 combined non-overlapping contigs were 45.4 kbp in length with 37.1% G+C, similar to  
240 the 44.2 kbp mitochondrial genome of *O. tauri* (38.2% G+C). These genomic fragments  
241 were found to be enriched in tRNAs and organelle genes. Predicted proteins for the  
242 organelles had mean pI values above 8, which may indicate different environmental  
243 conditions in the organelle than in the intracellular space (Table S2).

#### 244 *The complete genome sequence for a novel Nanohaloarchaea*

245 Our genome assembly produced a nanohaloarchaeon genome of 1.1 Mbp long, encoding  
246 for 1,292 genes, and with a G+C content of 46.4% (referred to as SG9) (Fig. 4). Although  
247 read abundances show the assembled contigs represented only ~1-3% of the population,  
248 these contigs likely assembled well because of the small genome size (1.1 Mbp), low  
249 levels of micro-diversity, and a genome coverage around 20. A phylogenetic analysis,  
250 using a set of 12 conserved concatenated genes, showed that *Candidatus Haloredivivus*  
251 (Ghai *et al.*, 2011) was the closest known reference (Fig. 5). The 16S rRNA gene

252 sequence of SG9 was 91% identical to that of *Candidatus Haloredivivus*, and 90 and  
253 88 % identical to *Candidatus Nanosalina* and *Candidatus Nanosalinarum*, respectively,  
254 and in agreement with our concatenated protein phylogeny. We have named this new  
255 microorganism, SG9, as *Candidatus Nanopetramus* SG9 (petramus: rock).

256 The SG9 genome was highly reduced and mostly composed of protein encoding genes,  
257 similar to previously reported genomes for *Nanohaloarchaea* (Narasingarao *et al.*, 2012)  
258 (Fig. 4). RAST annotation of the genome revealed that 79% of predicted proteins could  
259 not be assigned to known function. We predict that SG9 has a photoheterotrophic life  
260 style as indicated by the presence of genes for rhodopsin biosynthesis, archaeal genes for  
261 carbohydrate metabolism and a phosphoenolpyruvate-dependent sugar  
262 phosphotransferase system (PTS). The glucose-6-phosphate dehydrogenase gene,  
263 essential to the Pentose-Phosphate pathway and reported in both *Candidatus Nanosalina*  
264 and *Candidatus Nanosalinarum*, was absent (Narasingarao *et al.*, 2012). The presence in  
265 the SG9 genome of three potassium uptake systems, Trk, Ktr and HKT, which in bacteria  
266 are key components of osmotic regulation and resistance to high salinity (Becker *et al.*,  
267 2014), along with systems for K homeostasis, indicated a potential “salt-in” strategy for  
268 survival under high salt. This was supported by a low median pI for all *Candidatus*  
269 *Nanopetramus* SG9 predicted proteins (pI 4.7) and a pI distribution similar to that of  
270 *Haloarcula hispanica*, a salt-in strategist (Fig. S10). Potential motility was indicated by  
271 the presence of genes for archaeal flagellar proteins. Genes for bacterial-like and  
272 archaeal-like nucleotide excision repair pathways were also encoded in the SG9 genome,  
273 together with a photolyase gene, and several homologs for the *radA* recombinase gene.

274 We also found genes for isoprenoid biosynthesis, a S-layer protein, and for DNA  
275 polymerases PolII and PolIII, all genes typically found in archaea.

276 A Type I CRISPR/Cas system composed of eight CRISPR-associated proteins and a  
277 spacer/repeat region with 22 spacers was found in the SG9 genome (Fig. 6a). We found  
278 no evidence of a CRISPR system, or individual Cas proteins, in all publicly available  
279 nanohaloarchaea genomes using CRISPR-finder (Grissa *et al.*, 2007) and by searching  
280 for the Cas1 protein with a Cas1-HMM alignment using Hmmer3 (Wheeler and Eddy  
281 2013). The 11 kbp CRISPR region of SG9 had a significantly lower G+C content of  
282 41.5% than the whole genome (Fig. 6c). The difference in G+C%, along with the absence  
283 of any CRISPR loci in the genomes of its nearest neighbors, would indicate that SG9  
284 acquired its CRISPR system via horizontal gene transfer (HGT) (Ochman *et al.*, 2005).  
285 To further elucidate the origins of the CRISPR/Cas system in SG9, the *cas1* gene product  
286 was aligned with Cas1 proteins from diverse archaeal genomes (Fig. 6b). The resulting  
287 phylogeny showed that the Cas1 protein was rooted within the *Euryarchaeota*, making it  
288 likely that the locus was acquired from *Methanobacteria* or *Halobacteria* rather than the  
289 phylogenetically closer *Nanoarchaeota*. While *Halobacteria* genomes are characterized  
290 by high G+C%, the genomes of *Methanobacteria*, *Nanoarchaeota*, and that of the  
291 putative nanohaloarchaeal viruses (see below) all have low G+C% similar to the CRISPR  
292 locus of SG9.

293 A BLASTN analysis of all 22 spacers from the SG9 CRISPR array against the assembled  
294 halite metagenome returned a single hit for spacer 22 to contig Ha1987, which was found  
295 to be a partial viral genome. Spacer 22 was located adjacent to the Cas genes cluster  
296 indicating that it was the most recently added spacer to the CRISPR array.

297 *Halite community viral diversity*

298 Analysis of contigs reported by VirSorter (Roux *et al.*, 2015) and of circular viral contigs  
299 (CircMG) resulted in the identification of over 30 complete or near complete viral or  
300 proviral genomes in the halite metagenome (Tables 1 and S1). These viruses are novel  
301 with a majority of viral protein products that were either hypothetical or had no homologs  
302 in the nr database. Complete genome sizes ranged from 12 kbp to 70 kbp (Table 1).  
303 While members of the *Halobacteriales* were the predicted hosts for a majority of the  
304 viruses, the *Nanohaloarchaea* were predicted as putative hosts for viral genomes Ha139  
305 (G+C%, host genes) and Ha1987 (G+C%, spacer match), and the cyanobacterium  
306 *Halotheca* for viral genomes Ha238 (host genes, G+C%) and Ha322 (host genes, G+C%),  
307 based on the evidence indicated.

308 A majority of the annotated viral genomes shared few to no genes with other genomes,  
309 making a phylogenetic or tree-based analysis impractical. To elucidate relationships  
310 among viruses and the structure of the viral diversity in the halite community, we used a  
311 network-based approach in which genomes were linked in a weighted network by the  
312 proportion and percent identity of predicted proteins they shared with every other genome  
313 (Fig. 7). The Walktrap community finding algorithm was used to then classify viral  
314 genomes into one of six communities (I-VI), and representative members of each cluster  
315 were further annotated and curated (Table 1)

316 The protein similarity network used to build the network of viral relationships was  
317 examined for large clusters, which represented highly conserved proteins in the viral  
318 population. The eight largest clusters were extracted and annotated using both HHPred  
319 and BLASTP (Gish and States 1993, Söding *et al.*, 2005) (Figure 8). This analysis

320 confirmed that a majority of the viruses, particularly those in community I, had a head-  
321 tail structure. Distinct BLASTP hits to putative host transcriptional regulators were found  
322 throughout all the viral genomes and they often contained an HNH endonuclease domain.  
323 DNA polymerases were common in the larger genomes and DNA helicases were  
324 abundant in community III genomes.

325 Among haloviruses, the largest linear genomes, Ha32 and Ha68 (community II), were  
326 structurally similar to each other and shared several genes with HSTV-2, an icosahedrally  
327 symmetric Myovirus with host *Halorubrum* (Table 1). Both contained genes for tail  
328 assembly proteins, baseplate and portal proteins, and a prohead protease, all  
329 characteristics of large head-tail viruses. The circular Ha38 (community I) genome shared  
330 few proteins with Ha32/Ha68, and most of the predicted protein products had no  
331 homologs to haloviruses in the nr protein database. Ha38 shared several core phage genes  
332 with Myovirus HGTV-1, including a major capsid protein and a prohead protease (Table  
333 1). The genome of Ha38 also encoded DNA repair proteins (Rad25 and Hef nuclease)  
334 and a transcription initiation factor TFIIB similar to archaeal hosts. Other large, circular  
335 community I viruses (Ha86, Ha92) were not clearly related to any known halovirus and  
336 shared a small number of proteins with HGTV-1, HSTV-1, and HHTV-1, while the  
337 majority of encoded proteins had no known homologs (Table 1). Ha92 encoded for  
338 several haloarchaeal and bacterial transcriptional regulators. The Ha86 genome encoded  
339 for an ArsR family transcriptional regulator of the putative archaeal host and a *cas6* gene  
340 from a haloarchaea. Integrase genes were not found in Ha32 and Ha68, but were found in  
341 Ha216, Ha68, and Ha1987.

342 Genome Ha687 and the community III-associated genome Ha929 shared several genes  
343 for the structural proteins VP2 and VP4 with published *Halorubrum* pleomorphic viruses,  
344 including HRPV-1, a ssDNA halovirus (Table 1) (Pietila *et al.*, 2010). Both Ha966 and  
345 Ha934 (community IV) shared a majority of their proteins with each other and few with  
346 other identified viruses from the literature or this analysis. The two genomes were both  
347 circular and approximately 12 kbp in length. They had similar structure and gene  
348 composition but surprisingly their G+C content differed by 6.6% (Table 1). Annotated  
349 proteins in their genomes included the plasmid partition protein ParB, Zn-finger domain  
350 proteins, and DNA and RNA polymerase subunits.

351 Genomes Ha322, Ha238, Ha1987, and Ha139 uniquely had G+C content below 48%,  
352 while haloviruses typically have GC% above 50% (Table 1) (Klein *et al.*, 2002, Oren,  
353 2006, Pagaling *et al.*, 2007, Pietila *et al.*, 2013b, Pietila *et al.*, 2013c, Sencilo *et al.*, 2013,  
354 Tang *et al.*, 2002, Tang *et al.*, 2004). Spacer 22 from the CRISPR-Cas array above had an  
355 exact BLAST match to the linear and partially complete genome Ha1987, linking this  
356 virus to a Nanohaloarchaeal host. In addition, several of Ha1987 viral genes had close  
357 hypothetical homologs to the published *Candidatus* Haloredivivus sp. G17 genome (Ghai  
358 *et al.*, 2011). Ha139 was also putatively assigned to a Nanohaloarchaeal host because of  
359 its low G+C%, a shared hypothetical gene product with *Candidatus* Nanosalina, and  
360 because large number of gene products shared with environmental Halophage eHP-23  
361 and eHP-35 and two viral genomes previously assigned a Nanohaloarchaeal host (Garcia-  
362 Heredia *et al.*, 2012).

363 Both linear and incomplete genomes Ha322 and Ha238 had their closest BLASTP hits to  
364 multiple *Synechococcus* phage and cyanophage proteins, and had homologs for multiple



365 genes in several cyanobacteria. These findings suggest that they might be novel  
366 cyanophages targeting the *Halotheca* members of the community. Despite multiple close  
367 BLASTP hits to cyanophage proteins in public datasets, Ha322 and Ha238 contigs shared  
368 no homologous proteins with each other and did not cluster in the network analysis.

369

## 370 **Discussion**

371 Halite nodules in fossil continental evaporites from the Atacama Desert are at the  
372 extreme of salt concentrations for hypersaline environments. Microorganisms inhabiting  
373 this environment must balance the osmotic pressure of their cytoplasm with that of the  
374 outside milieu. One osmotic strategy is the “salt in” strategy where ions, mainly K<sup>+</sup> and  
375 Cl<sup>-</sup>, are accumulated in the cell and the entire intracellular enzymatic machinery is  
376 adapted to high salt (Oren, 2008). To remain soluble, the proteins of “salt-in” strategists  
377 have an increased number of acidic amino acid residues on their surface, resulting in a  
378 proteome with a low pI. This strategy is used by halophilic archaea and one extremely  
379 halophilic bacterium, *Salinibacter*, a member of the *Bacteroidetes* (Oren, 2008). Other  
380 halophilic and halotolerant microorganisms balance the high osmotic pressure of their  
381 environment by synthesizing compatible solutes, a strategy called “salt-out” (Galinski,  
382 1995, Oren, 2008).

### 383 *Adaptation of the halite community to high salt*

384 The phylogenetic composition of the halite community reflected the extreme salinity of  
385 its environment with Archaea greatly outnumbering Bacteria (Ghai *et al.*, 2011, Podell *et*  
386 *al.*, 2013, Robinson *et al.*, 2015). In addition, most of the bacteria in the community  
387 belonged to the genus *Salinibacter*, a “salt-in” strategist (Oren 2008). We found only one

388 cyanobacteria, *Halotheca*, as previously described using high-throughput 16S rRNA gene  
389 sequencing (Robinson *et al.*, 2015). Many species of cyanobacteria are adapted to high  
390 salt and they often form dense benthic mats in saline and hypersaline environments,  
391 where they are the main primary producers (Oren, 2015). However, above 25% NaCl  
392 only cyanobacteria of the *Aphanotheceae-Halotheca-Euhalotheca* cluster have been found  
393 so far (de los Rios *et al.*, 2010, Garcia-Pichel *et al.*, 1998, Robinson *et al.*, 2015,  
394 Wierzchos *et al.*, 2006). A property of this cluster is the production of abundant  
395 extracellular polysaccharides (EPS) (de los Rios *et al.*, 2010, Oren, 2015). We previously  
396 reported that, in the halite nodules, *Halotheca* formed cell aggregates surrounded by a  
397 thick sheath embedded in EPS (de los Rios *et al.*, 2010, Robinson *et al.*, 2015). It is likely  
398 that these structural components play a significant role in the desiccation tolerance of  
399 *Halotheca* and its ability for photosynthetic O<sub>2</sub> evolution (Tamaru *et al.*, 2005).

400 We found evidence of autotrophic CO<sub>2</sub> fixation via the CB pathway by cyanobacteria in  
401 the halite metagenome. Although we also found RubisCO type III gene in several archaea,  
402 it is not clear whether this enzyme participate in autotrophic CO<sub>2</sub> fixation or in a novel  
403 AMP recycling pathway (Falb *et al.*, 2008, Sato *et al.*, 2007). Our findings indicate that  
404 the unique cyanobacteria is likely responsible for most of the CO<sub>2</sub> fixed in the halite  
405 community. In addition, we recently reported *in situ* carbon fixation through oxygenic  
406 photosynthesis in halite nodules supporting the idea that cyanobacteria are the major  
407 primary producers in this ecosystem (Davila *et al.*, 2015). A number of organisms  
408 encoded light-driven proton pumps in their genomes, carrying out photoheterotrophy and  
409 significantly increasing the energy budget from light.

410 We assembled the partial genes of the alga previously detected in the halite community,  
411 together with large regions of the genomes of its mitochondria and chloroplast. The pI of  
412 the alga predicted proteins was one of the lowest pI reported for any eukaryote (Kiraga *et*  
413 *al.*, 2007). In addition, the bimodal distribution of the proteins pI was similar to that of  
414 “salt-in” strategists, suggesting that lower eukaryotes might potentially use intracellular  
415 salt as a mean to balance osmotic pressure in hypersaline environments.c

#### 416 *A novel nanohaloarchaeal genome with a CRISPR array*

417 We report here the first nanohaloarchaeon genome assembled into a single scaffolded  
418 contig from metagenome data of hypersaline environments (Ghai *et al.*, 2011, Martinez-  
419 Garcia *et al.*, 2014, Narasingarao *et al.*, 2012, Podell *et al.*, 2013). The *Candidatus*  
420 Nanopetramu SG9 genome of 1.1 Mb is very similar in size to that of previously reported  
421 Nanohaloarchaea and its genomic G+C content is intermediate in the reported range  
422 (Ghai *et al.*, 2011, Narasingarao *et al.*, 2012, Podell *et al.*, 2013). Evidence from its  
423 genome support the idea that *Candidatus* Nanopetramus SG9 has a photoheterotrophic  
424 life-style and that it uses the “salt-in” strategy to counterbalance the high salt of its  
425 environment. A low proteome pI has also been reported for *Candidatus* Nanoredivirus,  
426 suggesting that the “salt-in” strategy might be a ubiquitous feature of Nanohaloarchaea  
427 (Ghai *et al.*, 2011). A unique attribute of *Candidatus* Nanopetramus SG9 was the  
428 presence of a CRISPR array on its genome, demonstrating that adaptive immunity against  
429 viruses is also a feature of Nanohaloarchaeal genomes. This is the first report of  
430 annotated CRISPR-associated features in a nanohaloarchaeal genome and documented  
431 acquisitions of CRISPR/Cas systems via HGT in the Archaea (Godde and Bickerton,

432 2006, Portillo and Gonzalez, 2009, Brodt *et al.*, 2011) support our hypothesis that SG9  
433 acquired its CRISPR system via HGT.

#### 434 *The viral component of the halite community*

435 With up to  $10^{10}$  virus-like particles per ml, hypersaline systems harbor some of the  
436 highest viral concentrations of any aquatic environments (Baxter *et al.*, 2011, Boujelben  
437 *et al.*, 2012). In these extreme environments, with very few eukaryotes, haloviruses are  
438 likely to play an important role in shaping community structure through predation. We  
439 have assembled over 30 complete to near complete viral genomes from a metagenome  
440 obtained from the cellular fraction of the halite samples, restricting access to viruses that  
441 were either contained inside cells at the time of sampling or associated with particle  
442 surfaces. Despite this limitation, we found great viral diversity in the halite community in  
443 terms of genome structure, genome size, G+C%, and gene composition. These viruses  
444 were novel with a majority of the viral protein products having no characterized  
445 homologs. The viral genomes were not integrated within their host genomes in the  
446 metagenome assembly, suggesting that most of the viruses were lytic rather than  
447 lysogenic, in contrast to viruses found in high temperature environments (Anderson *et al.*,  
448 2015).

449 Viruses infecting haloarchaea come in a variety of virion morphotypes, including spindle-  
450 shaped, pleomorphic, icosahedral, and head-and-tail (Atanasova *et al.*, 2012, Pietila *et al.*,  
451 2013a, Roine and Oksanen, 2011). To date, 43 haloarchaeal tailed viruses have been  
452 reported (Atanasova *et al.*, 2012, Kukkaro and Bamford, 2009, Sabet, 2012) and 17  
453 completely sequenced genomes, comprised approximately 1.2 Mb of sequence  
454 information (Klein *et al.*, 2002, Pagaling *et al.*, 2007, Pietila *et al.*, 2013b, Pietila *et al.*,

455 2013c, Sencilo *et al.*, 2013, Tang *et al.*, 2002, Tang *et al.*, 2004). Our analysis confirmed  
456 that the majority of the viruses we identified in the halite metagenome also had a head-  
457 tail structure, as previously found in other hypersaline environments (Garcia-Heredia *et*  
458 *al.*, 2012). The viral genetic diversity uncovered here hints that a significant portion of  
459 the diversity of both head-tail and other viruses in halophilic environments still remains  
460 largely unexplored.

461 Our network-based approach allowed us to analyze viral relationships in the community  
462 and identify core protein encoding genes with similarity to previously described  
463 haloviruses and cyanophages (Klein *et al.*, 2002, Oren, 2006, Pagaling *et al.*, 2007,  
464 Pietila *et al.*, 2013b, Pietila *et al.*, 2013c, Sencilo *et al.*, 2013, Tang *et al.*, 2002, Tang *et*  
465 *al.*, 2004). Haloviruses genomes have rather high G+C content (above 50% on average),  
466 also characteristic of haloarchaea, and the halite viruses followed that trend. The  
467 exceptions were putative cyanophages and Nanohaloarchaea viruses that exhibited a  
468 lower G+C content, consistent with previous findings (Emerson *et al.*, 2012, Martinez-  
469 Garcia *et al.*, 2014, Podell *et al.*, 2013).

470 A number of partial halovirus genomes have been obtained from metagenomes from  
471 crystallizer ponds and the hypersaline Lake Tyrrell in Australia with potential hosts  
472 including *Haloquadratum walsbyi*, *Nanohaloarchaea*, and the bacterium *Salinibacter*  
473 (Emerson *et al.*, 2012, Garcia-Heredia *et al.*, 2012). Here we described new groups of  
474 viruses that prey on members of the *Halobacteriales*, the cyanobacterium *Halothece*, and  
475 on a newly described Nanohaloarchaeon, *Candidatus* Nanopetramus SG9. CRISPR  
476 sequences found in the newly described SG9 genome were also present on a partial viral

477 genome, providing a direct connection between virus and host. However, these  
478 predictions remain to be tested (Martinez-Garcia *et al.*, 2014).

479 Despite the extreme stress of the halite environment, this work demonstrates that this  
480 endolithic community is exquisitely adapted to the challenges of its environment.  
481 Metagenomic analysis revealed a relatively complex community with members from the  
482 three domains of life. It also revealed trophic levels, from photosynthetic primary  
483 producers to heterotrophs, viral predations, and specific physiological adaptations to the  
484 high osmotic pressure of the halite milieu. Further understanding of the major taxonomic  
485 groups and essential metabolic pathways underlying the functioning of this unique  
486 community will require a combination of field-based measurements of metabolic activity  
487 coupled with meta-transcriptomics, to capture gene expression levels for specific function  
488 and taxonomic groups.

489

## 490 **Acknowledgements**

491 This work was funded by grant EXOB08-0033 from NASA and grant NSF-0918907  
492 from the National Science foundation to JDR, by grant CGL2013-42509P from MINECO  
493 (Spain) to JW and by grant NNX12AD61G from NASA to AD. We thank Octavio  
494 Artieda for support in the field and Carmen Ascaso for valuable discussions.

495

496

## 497 **Conflicts of Interests**

498 The authors declare that there are no competing financial interests in relation to the work  
499 described here.

500

## 501 **References**

502 Anderson RE, Sogin ML, Baross JA (2015). Biogeography and ecology of the rare and  
503 abundant microbial lineages in deep-sea hydrothermal vents. *FEMS Microbiol Ecol*  
504 **91**: 1-11.

505 Atanasova NS, Roine E, Oren A, Bamford DH, Oksanen HM (2012). Global network of  
506 specific virus-host interactions in hypersaline environments. *Environ Microbiol* **14**:  
507 426-440.

508 Aziz RK, Bartels D, Best AA, DeJongh M, Disz T, Edwards RA *et al.* (2008). The RAST  
509 Server: rapid annotations using subsystems technology. *BMC Genomics* **9**: 75.

510 Bååth R (2014). Bayesian First Aid: A Package that Implements Bayesian Alternatives to  
511 the Classical \*. test Functions in R. *UseR 2014*; Los Angeles, USA.

512 Baxter BK, Mangalea MR, Willcox S, Sabet S, Nagoulat MN, Griffith JD (2011).  
513 Haloviruses of Great Salt Lake: A Model for Understanding Viral Diversity In:  
514 Ventosa A, Oren A, Ma Y (eds). *Halophiles and Hypersaline Environments*.  
515 Springer-Verlag: Berlin Heidelberg. pp 173-190.

516 Becker EA, Seitzer PM, Tritt A, Larsen D, Krusor M, Yao AI *et al.* (2014).  
517 Phylogenetically driven sequencing of extremely halophilic archaea reveals  
518 strategies for static and dynamic osmo-response. *PLoS Genet* **10**: e1004784.

- 519 Boujelben I, Yarza P, Almansa C, Villamor J, Maalej S, Anton J *et al.* (2012).  
520 Virioplankton community structure in Tunisian solar salterns. *Appl Environ*  
521 *Microbiol* **78**: 7429-7437.
- 522 Brodt A, Lurie-Weinberger MN, Gophna U (2011). CRISPR loci reveal networks of gene  
523 exchange in archaea. *Biol Direct* **6**: 65.
- 524 Castresana J (2000). Selection of conserved blocks from multiple alignments for their use  
525 in phylogenetic analysis. *Mol Biol Evol* **17**: 540-552.
- 526 Cereceda P, Larrain H, Osses P, Farías M, Egaña I (2008a). The spatial and temporal  
527 variability of fog and its relation to fog oases in the Atacama Desert, Chile.  
528 *Atmospheric Res* **87**: 312-323.
- 529 Cereceda P, Larrain H, Osses P, Farías M, Egaña I (2008b). The climate of the coast and  
530 fog zone in the Tarapacá Region, Atacama Desert, Chile. *Atmospheric Res* **87**: 301-  
531 311.
- 532 Chan Y, Lacap DC, Lau MC, Ha KY, Warren-Rhodes KA, Cockell CS *et al.* (2012).  
533 Hypolithic microbial communities: between a rock and a hard place. *Environ*  
534 *Microbiol* **14**: 2272-2282.
- 535 Chan Y, Van Nostrand JD, Zhou J, Pointing SB, Farrell RL (2013). Functional ecology  
536 of an Antarctic Dry Valley. *Proc Natl Acad Sci U S A* **110**: 8990-8995.
- 537 Clarke JDA (2006). Antiquity of aridity in the Chilean Atacama Desert. *Geomorphology*  
538 **73**: 101-114.
- 539 Crabtree J, Agrawal S, Mahurkar A, Myers GS, Rasko DA, White O (2014). Circleator:  
540 flexible circular visualization of genome-associated data with BioPerl and SVG.  
541 *Bioinformatics* **30**: 3125-3127.



- 542 Crits-Christoph A, Robinson CK, Barnum T, Fricke WF, Davila AF, Jedynak B *et al.*  
543 (2013). Colonization patterns of soil microbial communities in the Atacama Desert.  
544 *Microbiome* **1**: 28.
- 545 Csardi G, Nepusz T (2006). The igraph software package for complex network research.  
546 *Inter J Complex Systems* **1695** <http://igraph.org>.
- 547 Darling AE, Jospin G, Lowe E, Matsen FAt, Bik HM, Eisen JA (2014). PhyloSift:  
548 phylogenetic analysis of genomes and metagenomes. *Peer J* **2**: e243.
- 549 Davila AF, Gomez-Silva B, de los Rios A, Ascaso C, Olivares H, McKay CP *et al.*  
550 (2008). Facilitation of endolithic microbial survival in the hyperarid core of the  
551 Atacama Desert by mineral deliquescence. *J Geophys Res* **113**: G01028,  
552 doi:10.1010.01029/02007JG000561.
- 553 Davila AF, Hawes I, Garcia J, Gelsinger DR, DiRuggiero J, Ascaso C *et al.* (2015). In  
554 situ metabolism in halite endolithic microbial communities of the hyperarid Atacama  
555 Desert. *Frontiers Microbiol* <http://dx.doi.org/10.3389/fmicb.2015.01035>.
- 556 de los Rios A, Valea S, Ascaso C, Davila AF, Kastovsky J, McKay CP *et al.* (2010).  
557 Comparative analysis of the microbial communities inhabiting halite evaporites of  
558 the Atacama Desert. *Int Microbiol* **2**: 79-89.
- 559 DiRuggiero J, Wierzchos J, Robinson CK, Souterre T, Ravel R, Artieda O *et al.* (2013).  
560 Microbial Colonization of Chasmoendolithic Habitats in the Hyper-arid Zone of the  
561 Atacama Desert. *Biogeosciences* **10**: 2439-2450.
- 562 Edgar RC (2004). MUSCLE: multiple sequence alignment with high accuracy and high  
563 throughput. *Nucleic Acids Res* **32**: 1792-1797

- 564 Emerson JB, Thomas BC, Andrade K, Allen EE, Heidelberg KB, Banfield JF (2012).  
565 Dynamic viral populations in hypersaline systems as revealed by metagenomic  
566 assembly. *Appl Environ Microbiol* **78**: 6309-6320.
- 567 Falb M, Muller K, Konigsmaier L, Oberwinkler T, Horn P, von Gronau S *et al.* (2008).  
568 Metabolism of halophilic archaea. *Extremophiles* **12**: 177-196.
- 569 Friedmann EI (1982). Endolithic Microorganisms in the Antarctic Cold Desert. *Science*  
570 **215**: 1045-1053.
- 571 Galinski EA (1995). Osmoadaptation in bacteria. *Adv Microb Physiol* **37**: 272-328.
- 572 Garcia-Heredia I, Martin-Cuadrado AB, Mojica FJ, Santos F, Mira A, Anton J *et al.*  
573 (2012). Reconstructing viral genomes from the environment using fosmid clones: the  
574 case of haloviruses. *PLoS One* **7**: e33802.
- 575 Garcia-Pichel F, Nubel U, Muyzer G (1998). The phylogeny of unicellular, extremely  
576 halotolerant cyanobacteria. *Arch Microbiol* **169**: 469-482.
- 577 Ghai R, Pasic L, Fernandez AB, Martin-Cuadrado AB, Mizuno CM, McMahon KD *et al.*  
578 (2011). New abundant microbial groups in aquatic hypersaline environments. *Sci*  
579 *Rep* **1**: 135.
- 580 Gish W, States DJ (1993). Identification of protein coding regions by database similarity  
581 search. *Nature Genet* **3**: 266-272.
- 582 Godde JS, Bickerton A (2006). The repetitive DNA elements called CRISPRs and their  
583 associated genes: evidence of horizontal transfer among prokaryotes. *J Mol Evol* **62**:  
584 718-729.

- 585 Grissa I, Vergnaud G, Pourcel C (2007). The CRISPRdb database and tools to display  
586 CRISPRs and to generate dictionaries of spacers and repeats. *BMC Bioinformatics* **8**:  
587 172.
- 588 Hyatt D, Chen GL, Locascio PF, Land ML, Larimer FW, Hauser LJ (2010). Prodigal:  
589 prokaryotic gene recognition and translation initiation site identification. *BMC*  
590 *Bioinformatics* **11**: 119.
- 591 Kiraga J, Mackiewicz P, Mackiewicz D, Kowalczyk M, Biecek P, Polak N *et al.* (2007).  
592 The relationships between the isoelectric point and: length of proteins, taxonomy and  
593 ecology of organisms. *BMC Genomics* **8**: 163.
- 594 Klein R, Baranyi U, Rossler N, Greineder B, Scholz H, Witte A (2002). Natrialba  
595 magadii virus phiCh1: first complete nucleotide sequence and functional  
596 organization of a virus infecting a haloalkaliphilic archaeon. *Mol Microbiol* **45**: 851-  
597 863.
- 598 Kruschke JK (2013). Bayesian estimation supersedes the t test. *J Exp Psych Gen* **142**:  
599 573-603.
- 600 Kukkaro P, Bamford DH (2009). Virus-host interactions in environments with a wide  
601 range of ionic strengths. *Environ Microbiol Rep* **1**: 71-77.
- 602 Martinez-Garcia M, Santos F, Moreno-Paz M, Parro V, Anton J (2014). Unveiling viral-  
603 host interactions within the 'microbial dark matter'. *Nat Commun* **5**: 4542.
- 604 Meyer F, Paarmann D, D'Souza M, Olson R, Glass EM, Kubal M *et al.* (2008). The  
605 metagenomics RAST server - a public resource for the automatic phylogenetic and  
606 functional analysis of metagenomes. *BMC Bioinformatics* **9**: 386.

- 607 Narasingarao P, Podell S, Ugalde JA, Brochier-Armanet C, Emerson JB, Brocks JJ *et al.*  
608 (2012). De novo metagenomic assembly reveals abundant novel major lineage of  
609 Archaea in hypersaline microbial communities. *ISME J* **6**: 81-93.
- 610 Ochman H, Lerat E, Daubin V (2005). Examining bacterial species under the specter of  
611 gene transfer and exchange. *Proc Natl Acad Sci U S A* **102**: 6595-6599.
- 612 Oren A (2006). The order halobacteriales. In: Dworkin M, Falkow S, Rosenberg E,  
613 Schleife RK-H, Stackebrandt E (eds). *The Prokaryotes*. Springer;: Singapore. pp  
614 113-164.
- 615 Oren A (2008). Microbial life at high salt concentrations: phylogenetic and metabolic  
616 diversity. *Saline Systems* **4**: doi:10.1186/1746-1448-1184-1182.
- 617 Oren A (2015). Cyanobacteria in hypersaline environments: biodiversity and  
618 physiological properties. *Biodivers Conserv* **24**: 781–798.
- 619 Pagaling E, Haigh RD, Grant WD, Cowan DA, Jones BE, Ma Y *et al.* (2007). Sequence  
620 analysis of an Archaeal virus isolated from a hypersaline lake in Inner Mongolia,  
621 China. *BMC Genomics* **8**: 410.
- 622 Pandit AS, Joshi MN, Bhargava P, Shaikh I, Ayachit GN, Raj SR *et al.* (2015). A  
623 snapshot of microbial communities from the Kutch: one of the largest salt deserts in  
624 the World. *Extremophiles* **19**: 973-987.
- 625 Paul S, Bag SK, Das S, Harvill ET, Dutta C (2008). Molecular signature of hypersaline  
626 adaptation: insights from genome and proteome composition of halophilic  
627 prokaryotes. *Genome Biol* **9**: R70.

- 628 Peng Y, Leung HC, Yiu SM, Chin FY (2012). IDBA-UD: a de novo assembler for  
629 single-cell and metagenomic sequencing data with highly uneven depth.  
630 *Bioinformatics* **28**: 1420-1428.
- 631 Pietila MK, Laurinavicius S, Sund J, Roine E, Bamford DH (2010). The single-stranded  
632 DNA genome of novel archaeal virus halorubrum pleomorphic virus 1 is enclosed in  
633 the envelope decorated with glycoprotein spikes. *J Virol* **84**: 788-798.
- 634 Pietila MK, Atanasova NS, Oksanen HM, Bamford DH (2013a). Modified coat protein  
635 forms the flexible spindle-shaped virion of haloarchaeal virus His1. *Environ*  
636 *Microbiol* **15**: 1674-1686.
- 637 Pietila MK, Laurinmaki P, Russell DA, Ko CC, Jacobs-Sera D, Butcher SJ *et al.* (2013b).  
638 Insights into head-tailed viruses infecting extremely halophilic archaea. *J Virol* **87**:  
639 3248-3260.
- 640 Pietila MK, Laurinmaki P, Russell DA, Ko CC, Jacobs-Sera D, Hendrix RW *et al.*  
641 (2013c). Structure of the archaeal head-tailed virus HSTV-1 completes the HK97  
642 fold story. *Proc Natl Acad Sci U S A* **110**: 10604-10609.
- 643 Podell S, Ugalde JA, Narasingarao P, Banfield JF, Heidelberg KB, Allen EE (2013).  
644 Assembly-driven community genomics of a hypersaline microbial ecosystem. *PLoS*  
645 *One* **8**: e61692.
- 646 Pointing SB, Chan Y, Lacap DC, Lau MC, Jurgens JA, Farrell RL (2009). Highly  
647 specialized microbial diversity in hyper-arid polar desert. *Proc Natl Acad Sci U S A*  
648 **106**: 19964-19969.
- 649 Pointing SB, Belnap J (2012). Microbial colonization and controls in dryland systems.  
650 *Nat Rev Microbiol* **10**: 551-562.

- 651 Pons P, Latapy M (2005). Computing communities in large networks using random walks  
652 *arXiv:physics/0512106 [physics:oc-ph]*.
- 653 Portillo MC, Gonzalez JM (2009). CRISPR elements in the Thermococcales: evidence  
654 for associated horizontal gene transfer in *Pyrococcus furiosus*. *J. Appl Genet* **50**:  
655 421-430.
- 656 Price MN, Dehal PS, Arkin AP (2010). FastTree 2--approximately maximum-likelihood  
657 trees for large alignments. *PLoS One* **5**: e9490.
- 658 Robinson CK, Wierchos J, Black C, Crits-Christoph A, Ma B, Ravel J *et al.* (2015).  
659 Microbial diversity and the presence of algae in halite endolithic communities are  
660 correlated to atmospheric moisture in the hyper-arid zone of the Atacama Desert.  
661 *Environ Microbiol* **17**: 299-315.
- 662 Rodriguez-Valera F, Martin-Cuadrado AB, Rodriguez-Brito B, Pasic L, Thingstad TF,  
663 Rohwer F *et al.* (2009). Explaining microbial population genomics through phage  
664 predation. *Nat Rev Microbiol* **7**: 828-836.
- 665 Roine E, Oksanen HM (2011). Viruses from the hypersaline environments: current  
666 research and future trends. In: Ventosa A, Oren A, Ma Y (eds). *Halophiles and*  
667 *Hypersaline Environments*. Springer: Heidelberg. pp 153–172
- 668 Roux S, Enault F, Hurwitz BL, Sullivan MB (2015). VirSorter: mining viral signal from  
669 microbial genomic data. *Peer J* **3**: e985.
- 670 Sabet S (2012). Halophilic viruses. In: Vreeland R (ed). *Advances in Understanding the*  
671 *Biology of Halophilic Microorganisms*. Springer: New York, NY. pp 81–116

- 672 Santos F, Yarza P, Parro V, Meseguer I, Rossello-Mora R, Anton J (2012). Culture-  
673 independent approaches for studying viruses from hypersaline environments. *Appl*  
674 *Environ Microbiol* **78**: 1635-1643.
- 675 Sato T, Atomi H, Imanaka T (2007). Archaeal type III RuBisCOs function in a pathway  
676 for AMP metabolism. *Science* **315**: 1003-1006.
- 677 Sencilo A, Jacobs-Sera D, Russell DA, Ko CC, Bowman CA, Atanasova NS *et al.* (2013).  
678 Snapshot of haloarchaeal tailed virus genomes. *RNA Biol* **10**: 803-816.
- 679 Sencilo A, Roine E (2014). A Glimpse of the genomic diversity of haloarchaeal tailed  
680 viruses. *Front Microbiol* **5**: 84.
- 681 Söding J, Biegert A, Lupas AN (2005). The HHpred interactive server for protein  
682 homology detection and structure prediction. *Nucl Acids Res* **33**: W244-W248;  
683 doi:210.1093/nar/gki1040.
- 684 Tamaru Y, Takani Y, Yoshida T, Sakamoto T (2005). Crucial role of extracellular  
685 polysaccharides in desiccation and freezing tolerance in the terrestrial  
686 cyanobacterium *Nostoc commune*. *Appl Environ Microbiol* **71**: 7327-7333.
- 687 Tang SL, Nuttall S, Ngui K, Fisher C, Lopez P, Dyall-Smith M (2002). HF2: a double-  
688 stranded DNA tailed haloarchaeal virus with a mosaic genome. *Mol Microbiol* **44**:  
689 283-296.
- 690 Tang SL, Nuttall S, Dyall-Smith M (2004). Haloviruses HF1 and HF2: evidence for a  
691 recent and large recombination event. *J Bacteriol* **186**: 2810-2817.
- 692 Walker JJ, Pace NR (2007). Endolithic microbial ecosystems. *Annu Rev Microbiol* **61**:  
693 331-347.

694 Wei STS, Fernandez-Martinez M, Chan Y, Van Nostrand JD, de los Rios-Murillo A,  
695 Chiu JMY *et al.* (2015). Diverse metabolic and stress-tolerance pathways in  
696 chasmoendolithic and soil communities of Miers Valley, McMurdo Dry Valleys,  
697 Antarctica. *Polar Biol* **38**: 433-443.

698 Wheeler TJ, Eddy SR (2013). nhmmer: DNA Homology Search With Profile HMMs.  
699 *Bioinformatics* **28**: 2487-2489.

700 Wierzchos J, Ascaso C, McKay CP (2006). Endolithic cyanobacteria in halite rocks from  
701 the hyperarid core of the Atacama Desert. *Astrobiology* **6**: 415-422.

702 Wierzchos J, Davila AD, Sánchez-Almazo IM, Hajnos M, Swieboda R, Ascaso C  
703 (2012a). Novel water source for endolithic life in the hyperarid core of the Atacama  
704 Desert. *Biogeosci Discuss* **9**: 3071-3098.

705 Wierzchos J, de los Ríos A, Ascaso C (2012b). Microorganisms in desert rocks: the edge  
706 of life on Earth. *Inter Microbiol* **15**: 173-183.

707 Wood DE, Salzberg SL (2014). Kraken: ultrafast metagenomic sequence classification  
708 using exact alignments. *Genome Biol* **15**: R46.

709 Wu YW, Tang YH, Tringe SG, Simmons BA, Singer SW (2014). MaxBin: an automated  
710 binning method to recover individual genomes from metagenomes using an  
711 expectation-maximization algorithm. *Microbiome* **2**: 26.

712 Ziolkowski LA, Wierzchos J, Davila AF, Slater GF (2013). Radiocarbon evidence of  
713 active endolithic microbial communities in the hyper-arid core of the Atacama  
714 Desert,. *Astrobiology* **13**: 607-616.

715



## 716 **Figure legends**

717 Figure 1: (a) Shaded relief digital map of the northern Atacama Desert, Chile, with the  
718 Salar Grande sampling location (triangle); (b) Salar Grande halite nodule field; (c)  
719 Section of a halite nodule with a back arrow indicating the green diffuse colonization  
720 zone.

721

722 Figure 2: Taxonomic assignments of the halite metagenome sequence reads using  
723 Phylosift and displayed with Krona.

724

725 Figure 3: Comparison of isoelectric point profiles of the predicted proteomes for the  
726 halite alga (blue) and 3 closely related halophilic algae, *Micromonas sp. RCC299* (red),  
727 *Ostreococcus tauri* (purple), and *Dunaliella salina* (orange). All reported protein  
728 sequences in the nr database were used for *Micromonas sp. RCC299* and *O. tauri*.  
729 Sequences from the UniProt Protein database were used for *D. salina*.

730

731 Figure 4: Circular representation of the SG9 genome using the Circleator tool (Crabtree  
732 *et al.*, 2014). The G+C% of a 10 kbp window is displayed on the outermost circle (G+C  
733 scale: 40 to 50%). Following circles represent predicted genes on the forward strand and  
734 reverse strands, respectively; genes related to potassium homeostasis and uptake are in  
735 red, genes related to a heterotrophic lifestyle are in green, genes related to DNA repair  
736 are in purple, and Cas genes are in orange. The position of the ribosomal rRNA genes is  
737 indicated in grey.

738

739 Figure 5: Phylogenetic position of the novel *Candidatus* Nanopetramus SG9 genome  
740 within the Archaea. The tree was built with alignments of concatenated genes for *rpsB*,  
741 *rplA*, *IF-2*, *rpsI*, *S5*, *S7*, *rplF*, *rplE*, *rpsK*, *S8*, *L18P/L5E*, and *rplM*. Euryarcheota are in  
742 Red, the TACK phyla in purple, Nanoarchaeota in blue, and the Nanohaloarcheota in  
743 green. Bacterial species were used as an outgroup. The scale bar represents 0.2 %  
744 sequence divergence. Bootstrap values (1000 replicates) are shown at nodes.

745

746 Figure 6: (a) A diagram of the CRISPR/Cas system found in the *Candidatus*  
747 Nanopetramus SG9 genome; (b) phylogenetic analysis of Cas1 gene products. Bootstrap  
748 values (1000 replicates) are shown at nodes; and (c) G+C% of a 10 kbp windows, with a  
749 1 kbp step size, across the SG9 genome with the CRISPR 10 kbp region marked by a red  
750 line.

751

752 Figure 7: Phage-phage similarity network visualizing relationships between viral  
753 genomes. Edges are weighted based on the proportion and % ID of shared genes between  
754 two genomes. Viruses are colored according to network communities predicted by the  
755 Walktrap community finding algorithm: (I), blue; (II) red; (III) yellow; (IV) green; (V)  
756 pink; (VI) orange.

757

758 Figure 8: Protein-protein similarity networks of the largest clusters of viral proteins,  
759 colored by the cluster assigned to the derivative virus genome of each protein.

760

761 Table 1: Viral genome composition and structure diversity.  
762

| Contig Size | GC%       | Genome Structure    | Putative Host   | Features                                                                                                                  | Virus group                                                                         |
|-------------|-----------|---------------------|-----------------|---------------------------------------------------------------------------------------------------------------------------|-------------------------------------------------------------------------------------|
| 32* (II)    | 70.0 51.5 | Linear              | Halobacteria    | DNA pol II, B, RNA ligase, tail assembly, baseplate J, major capsid, prohead protease, portal protein.                    | Myovirus (similar to HSTV-2)                                                        |
| 38* (I)     | 64.0 54.9 | Circular            | Halobacteria    | DNA primase/helicase, HNH, tape measure, major capsid, prohead protease, phage head morphogenesis, terminase, DNA pol II. | Myovirus (similar to HGTV-1)                                                        |
| 68* (II)    | 52.7 50.3 | Linear              | Halobacteria    | Portal protein, tail assembly baseplate J, RNA ligase, prohead protein, integrase, DNA pol II small subunit.              | Myovirus (similar to HSTV-2)                                                        |
| 92* (I)     | 44.5 63.9 | Circular            | Halobacteria    | HNH, DNA/RNA Helicase, PadR TR, terminase, major capsid, tape measure, Zn finger.                                         | Myovirus-like                                                                       |
| 86 (I)      | 46.2 63.8 | Linear / Incomplete | Halobacteria    | Cas6, SNase-like protein, HNH, major capsid, tail protein, baseplate assembly J.                                          | Myovirus-like (shares 2 genes with HHTV-1)                                          |
| 139* (I)    | 34.1 43.3 | Circular            | Nanohaloarchaea | capsid protein, phage terminase, excinuclease,                                                                            | Similar to Environmental Halophage eHP-23 and eHP-35                                |
| 216*        | 26.4 65   | Circular            | Halobacteria    | Integrase, RNA pol sigma 24 subunit, resolvase.                                                                           | No head/tail, similar to <i>Halosimplex carlsbadense</i> provirus                   |
| 238 (I)     | 24.0 47.2 | Linear / Incomplete | Halothece       | DNA primase/helicase, DNA pol I, tail fiber, tape measure                                                                 | Cyanophage; shares genes with <i>Synechococcus</i> phage S-CBS4 and cyanophage PSS2 |

|               |           |                     |                 |                                                                   |                                                                                                           |
|---------------|-----------|---------------------|-----------------|-------------------------------------------------------------------|-----------------------------------------------------------------------------------------------------------|
| 257*<br>(V)   | 23.3 63.2 | Circular            | Halobacteria    | Phage repressor, replication protein, ATPase.                     | No head/tail; shares genes with <i>Halorubrum</i> phage GNf2                                              |
| 322<br>(VI)   | 21.0 45.2 | Linear / Incomplete | Halothece       | Phage tail protein, phage baseplate protein.                      | Cyanophage; Shares genes with <i>Synechococcus</i> phage S-ShM2 and <i>Prochlorococcus</i> phage P-RSM4   |
| 687*<br>(III) | 14.4 61.4 | Circular            | Halobacteria    | VP2, VP4, replication protein.                                    | Shares genes with <i>Halobacteria</i> pleomorphic viruses                                                 |
| 929*          | 12.3 62.5 | Circular            | Halobacteria    | RNA polymerase sigma-24 subunit, integrase, PhiH1 repressor, VP1. | Shares genes with <i>Haloarcula hispanica</i> icosahedral virus and <i>Halorubrum</i> pleomorphic virus 3 |
| 934<br>(IV)*  | 12.3 57.6 | Circular            | Halobacteria    | DNA pol subunits, ParB, Zn-finger domain.                         | Shares gene with HSTV-1 (Podovirus)                                                                       |
| 966*<br>(IV)  | 12.0 63.9 | Circular            | Halobacteria    | ParB, Zn-finger domain.                                           | Shares gene with HSTV-1 (Podovirus)                                                                       |
| 1987<br>(III) | 8.4 46.1  | Linear / Incomplete | Nanohaloarchaea | CRISPR spacer match, Integrase, VP4 precursor, CopG TF.           |                                                                                                           |

763 \*Annotation curated and submitted; community type in parenthesis

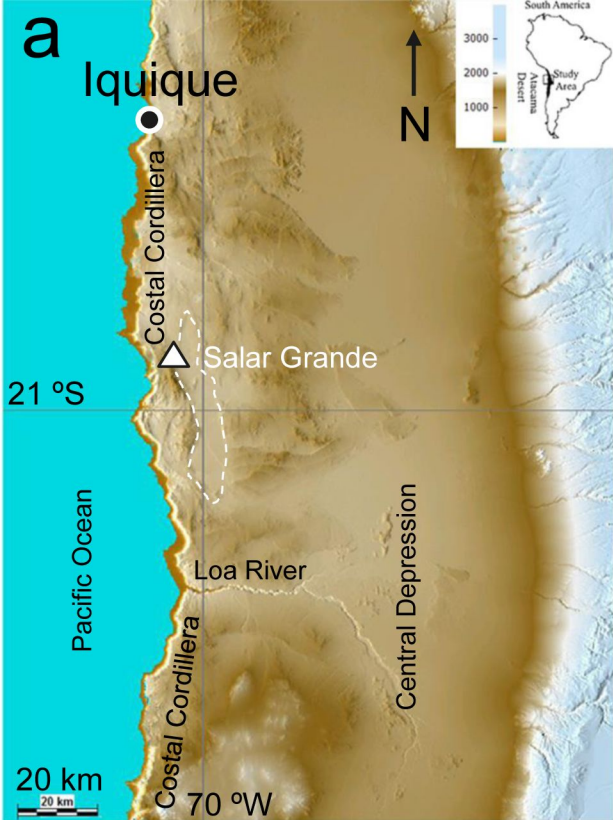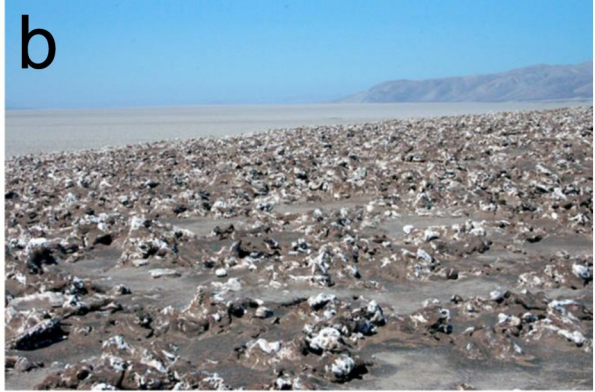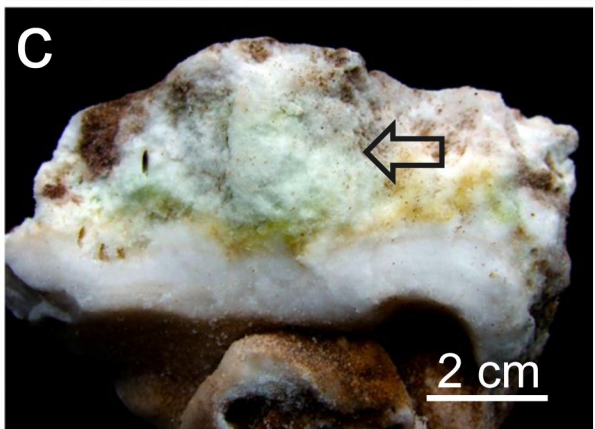

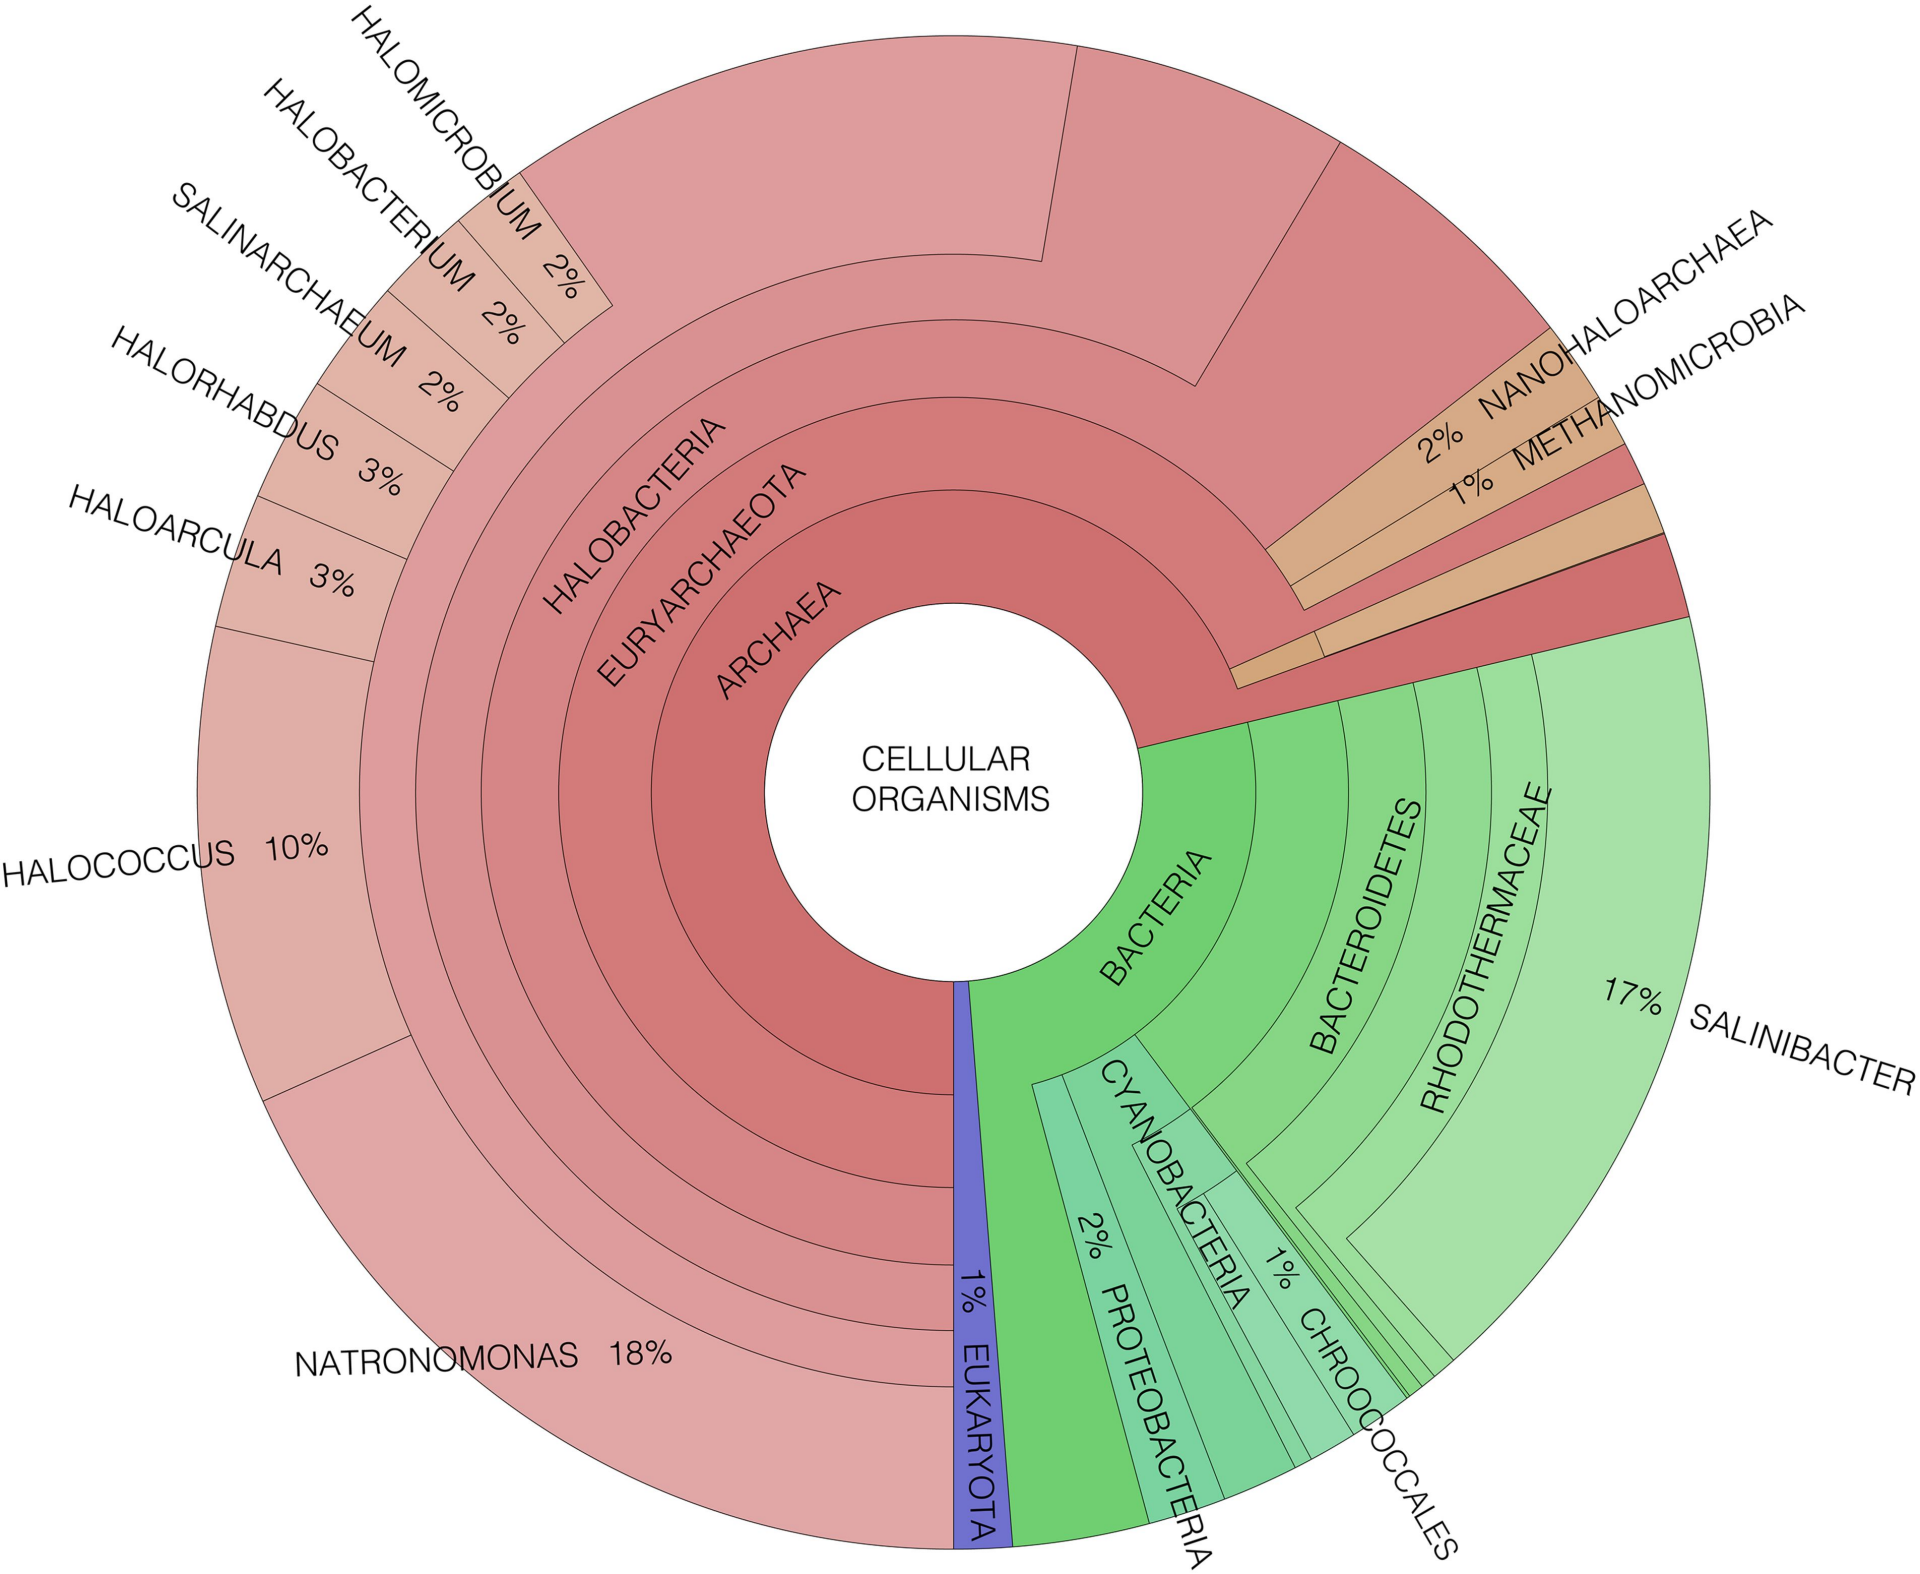

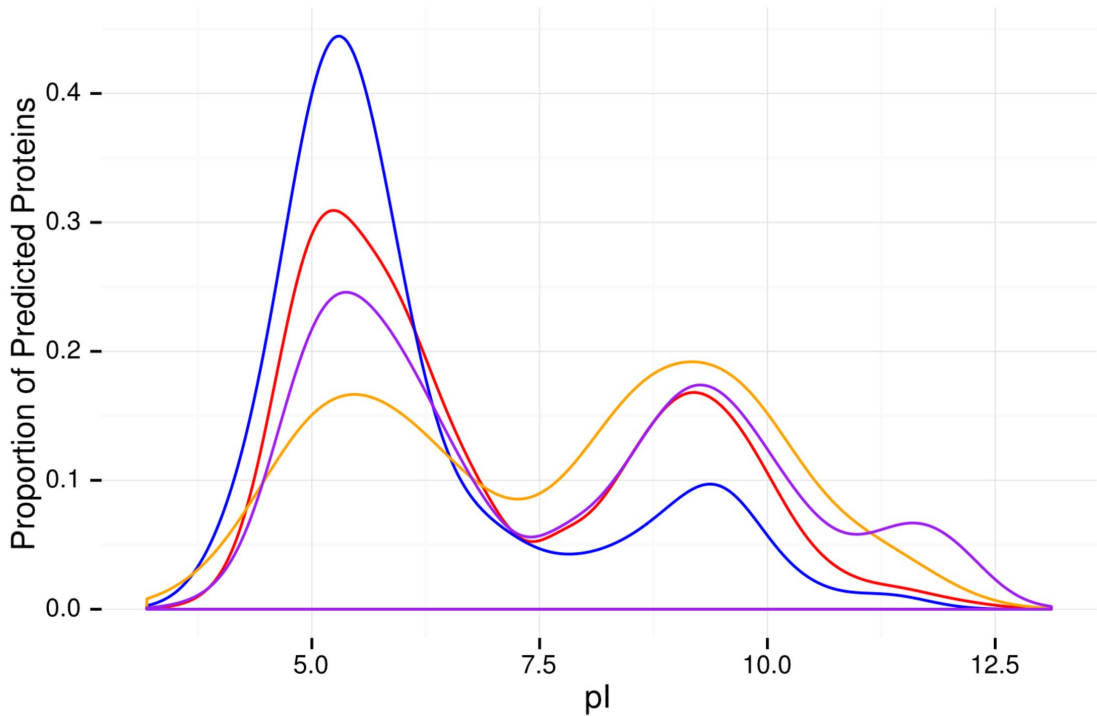

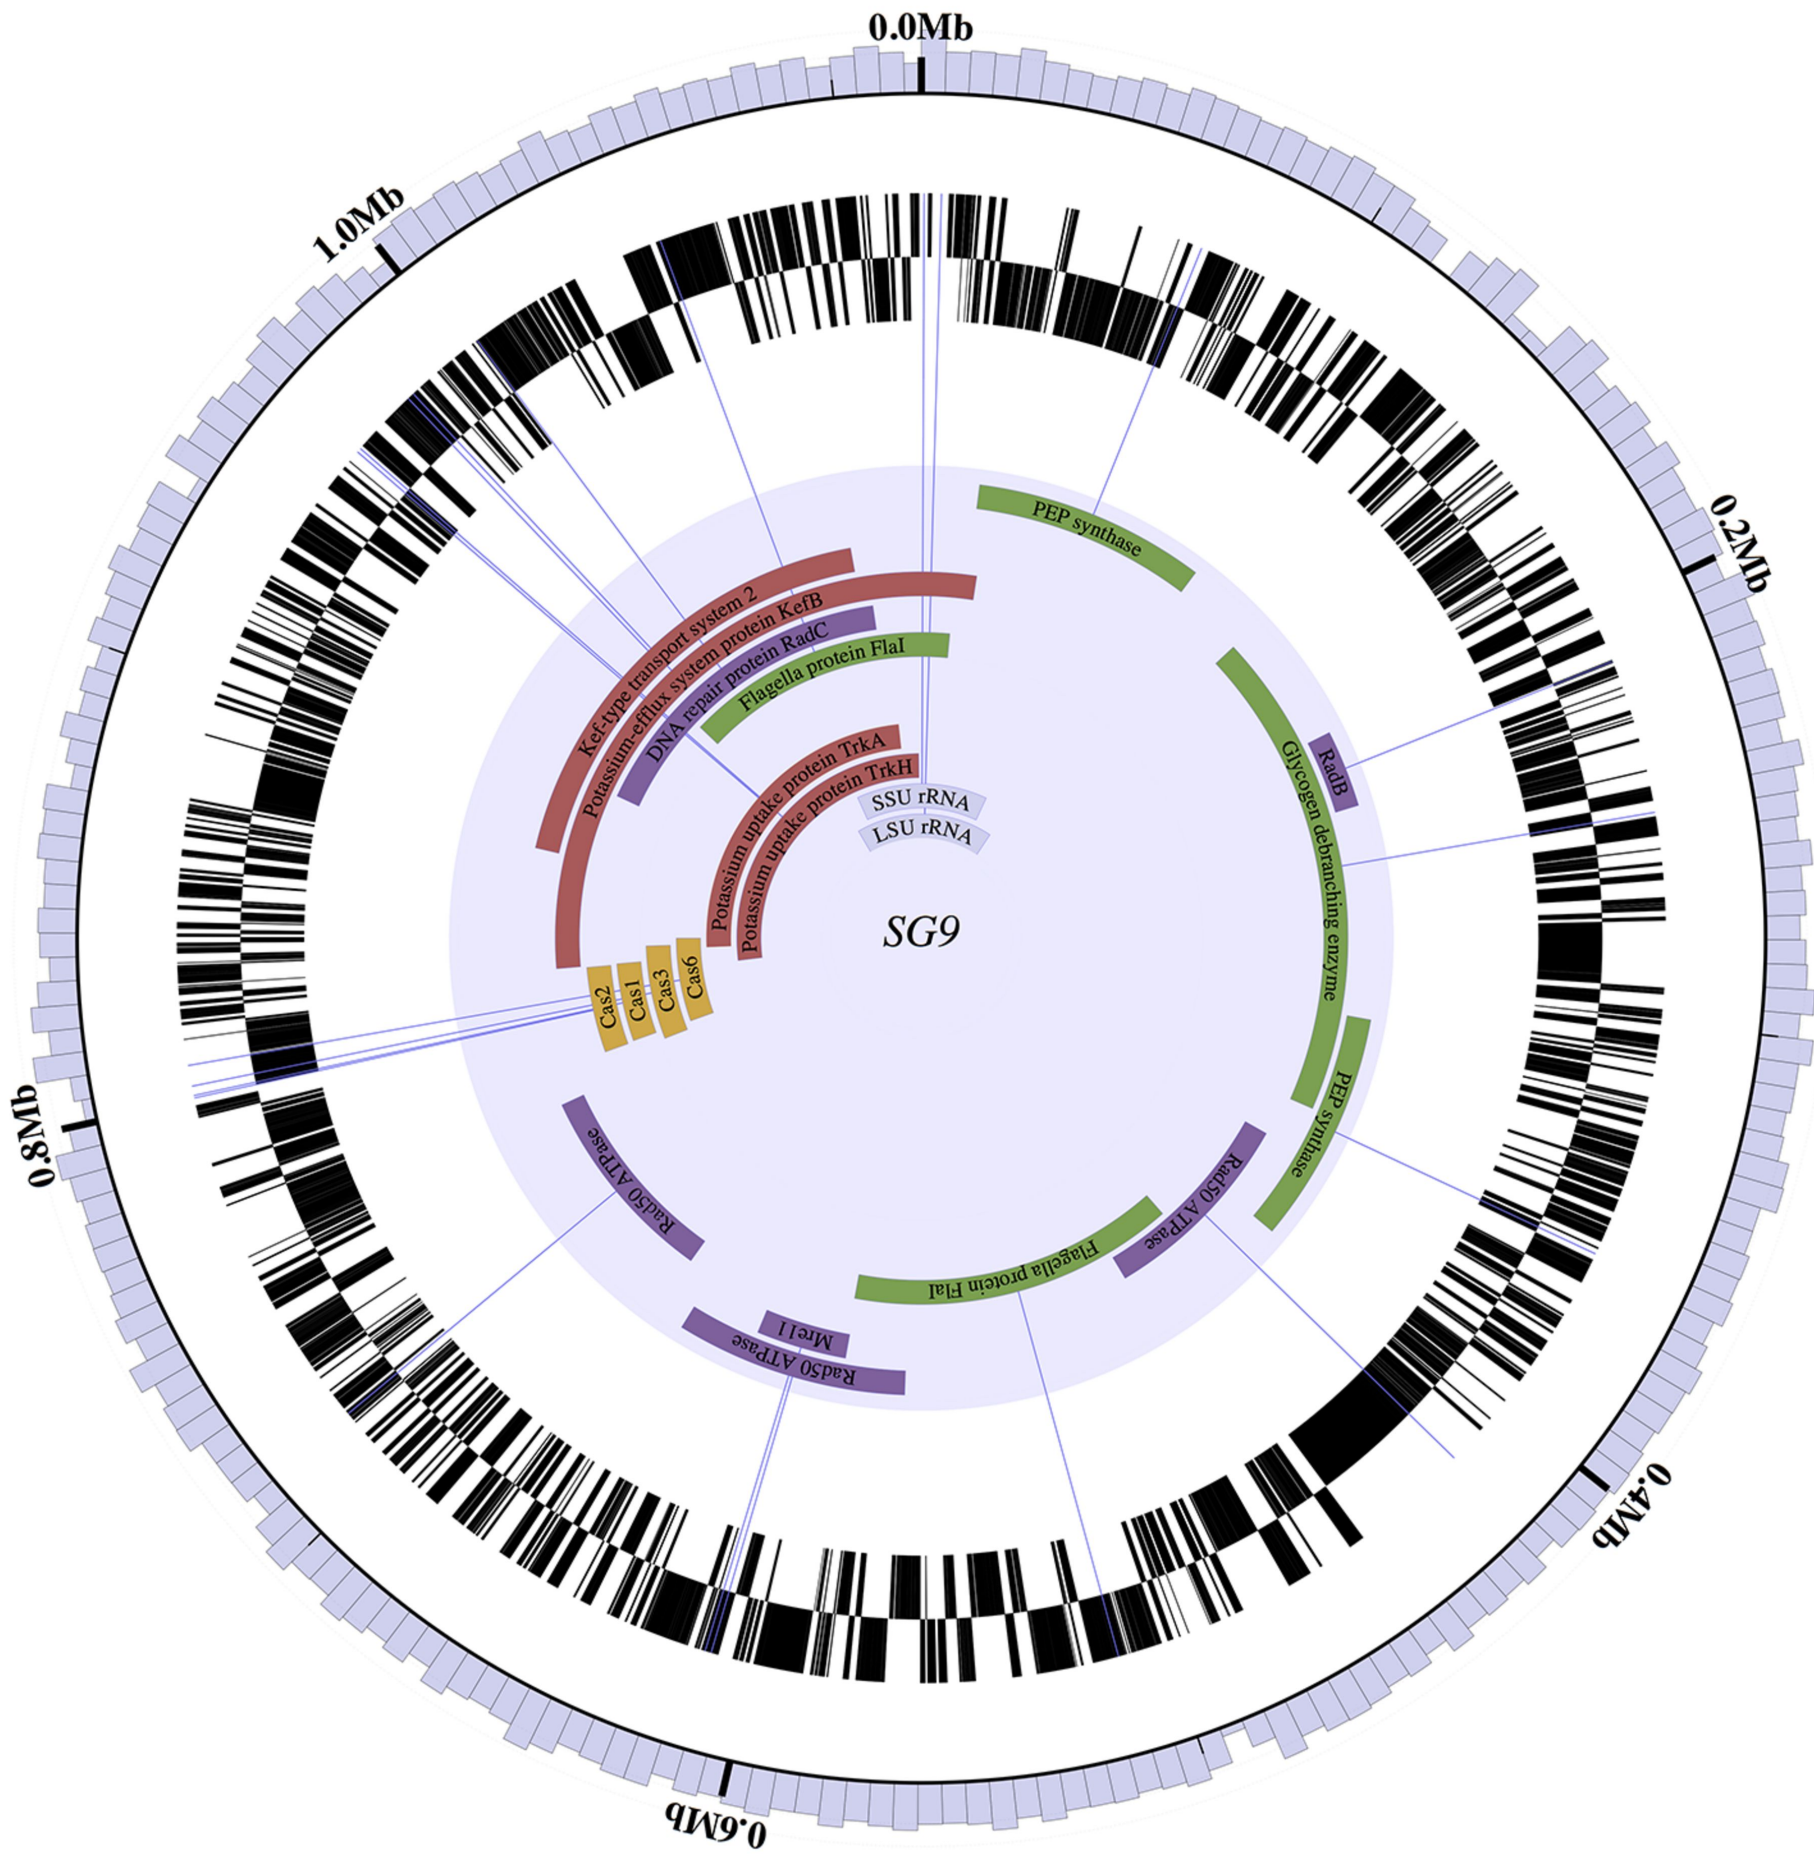



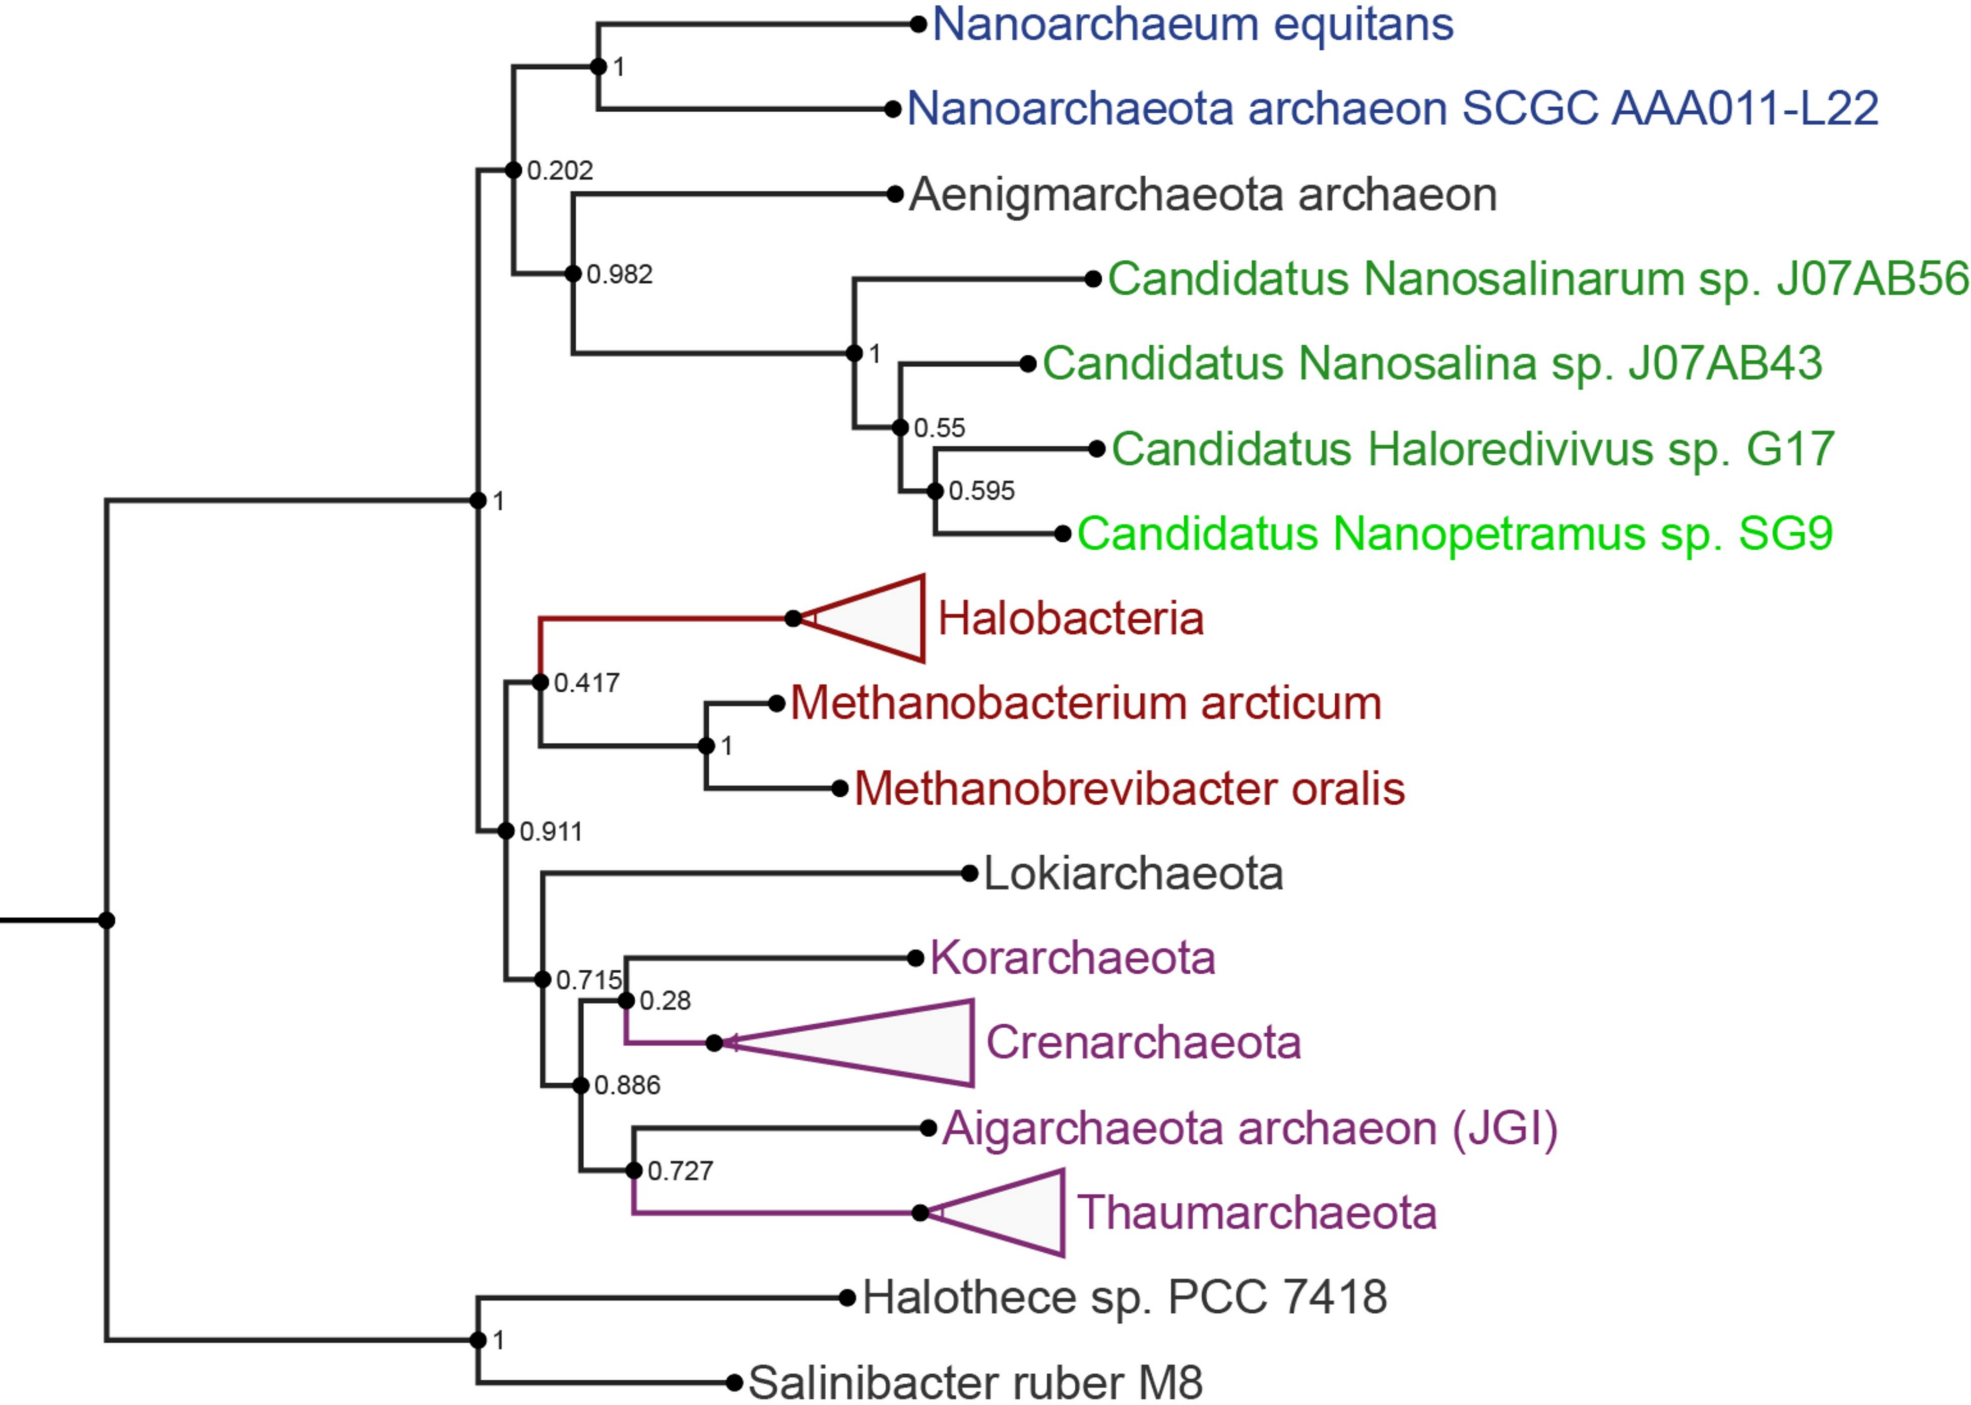

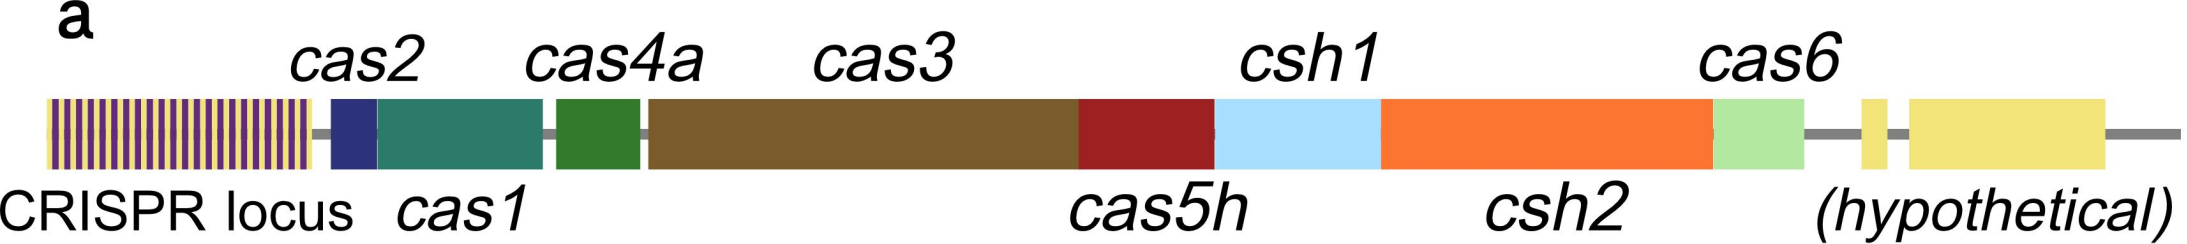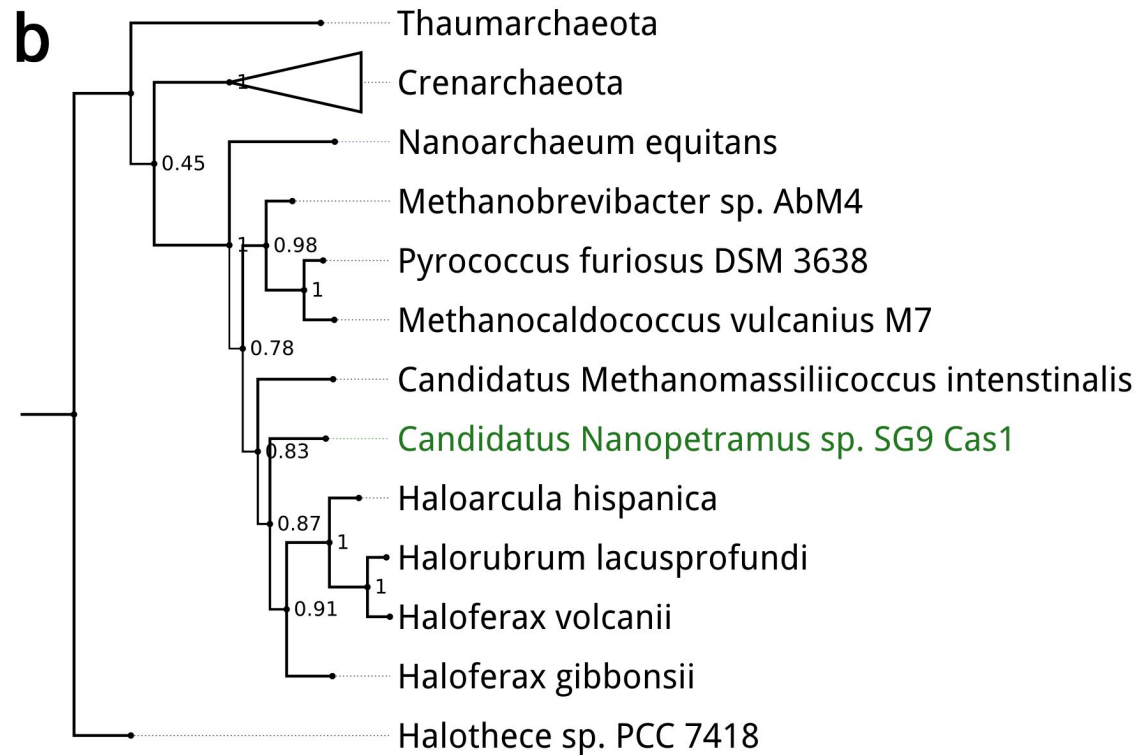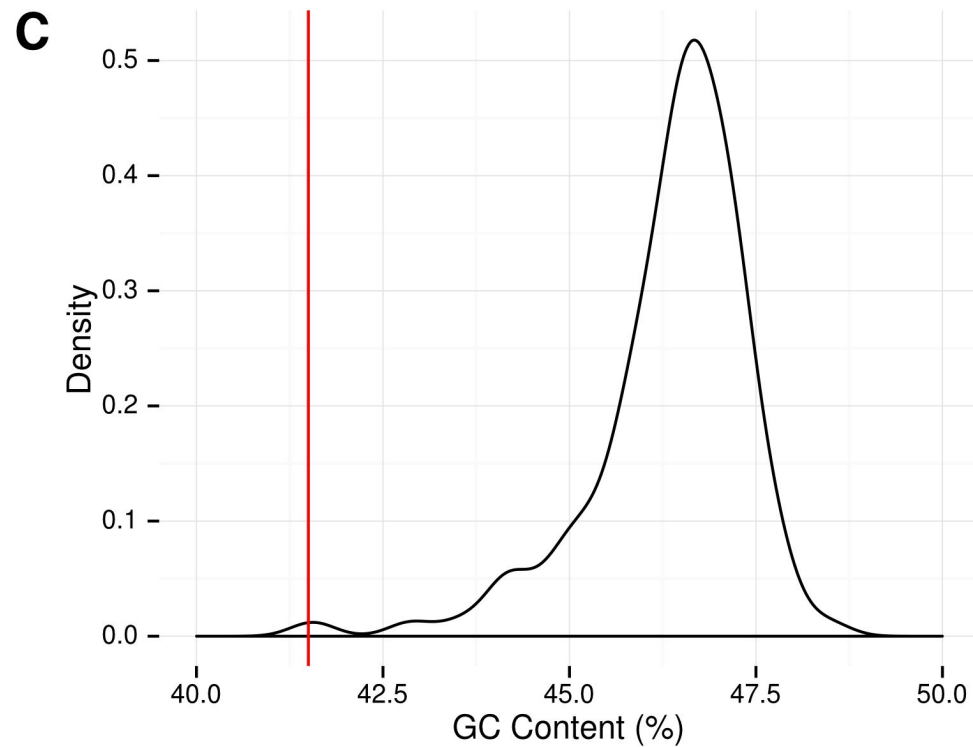

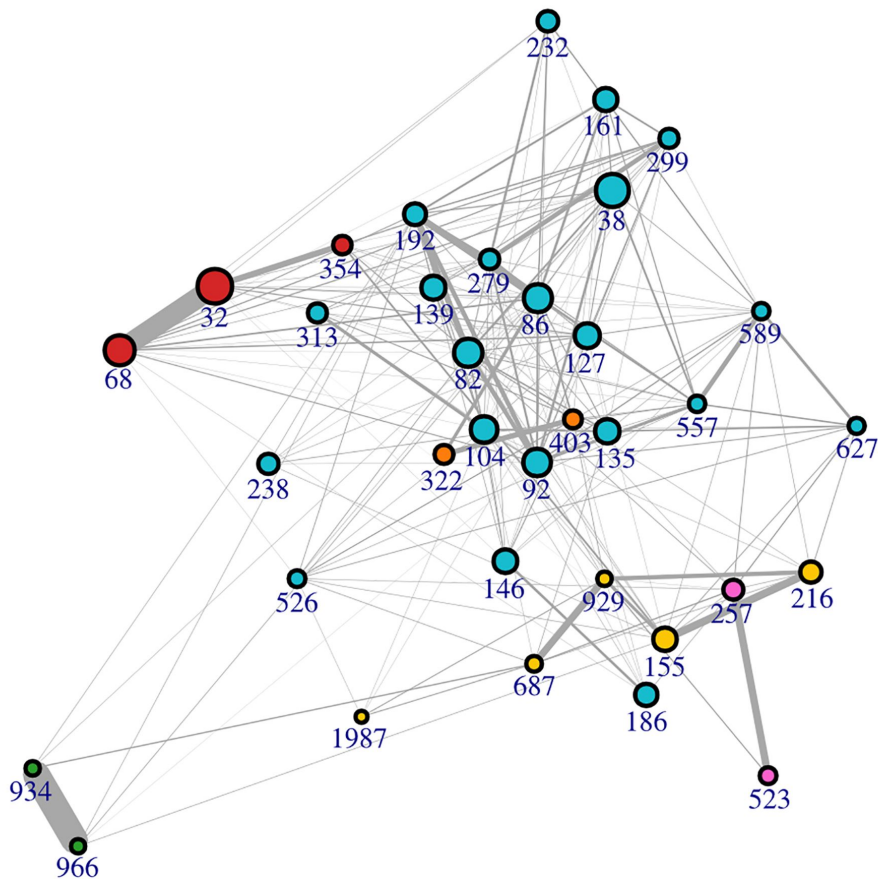

DNA polymerase B

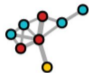

HNH endonuclease associated

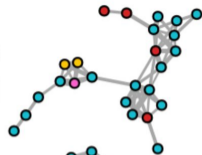

Phage head assembly

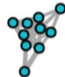

Tail tape measure

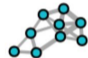

DNA primase/helicase

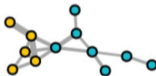

Terminase

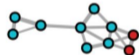

Terminase large subunit

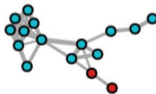

Prohead protease

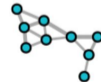

Source: https://www.biorxiv.org/content/10.1101/029934v1.full.pdf
